# Supplementary material
Source: publisher figshare collection journal article supplement (https://tandf.figshare.com/ndownloader/files/23064380)
Supplement: Supplementary file 1 [file 23064380]

Supporting Information for:

Evaluation of association schemes in the CPA and PC-SAFT equations in modelling VLE of organic acids + water systems

Luis A. Román-Ramíreza,*, Fernando García-Sánchezb and Gary A. Leekea

a School of Chemical Engineering, University of Birmingham, Edgbaston, Birmingham, B15 2TT, United Kingdom.

b Gerencia de Ingeniería de Recuperación Adicional, Instituto Mexicano del Petróleo. Eje Central Lázaro Cárdenas Norte No. 152, 07730 Ciudad de México, México.

* Corresponding author. Tel.: +44 (0) 121 414 5081. E-mail address: romanrla@bham.ac.uk.

Table of Contents

[Thermodynamic models 3](#_Toc35958339)

[CPA 3](#_Toc35958340)

[PC-SAFT / PCP-SAFT 5](#_Toc35958341)

[Hard-chain term 5](#_Toc35958342)

[Dispersion term 6](#_Toc35958343)

[Association term 7](#_Toc35958344)

[Polar term 8](#_Toc35958345)

[Experimental data 10](#_Toc35958346)

[Calculated deviations and binary interaction parameters 11](#_Toc35958347)

[References 25](#_Toc35958348)

# Thermodynamic models

## CPA

The CPA EoS in terms of the residual Helmholtz free energy () is ([Kontogeorgis and Folas 2010](#_ENREF_9)):

|  | (S1) |
| --- | --- |

Where is the residual free energy for the physical interactions calculated from the Soave-Redlich-Kwong (SRK) EoS ([Michelsen and Mollerup 2007](#_ENREF_14)):

|  | (S2) |
| --- | --- |

and are computed from van der Waals one-fluid mixing rules according to:

|  | (S3) |
| --- | --- |

|  | (S4) |
| --- | --- |

with the following classical combining rules:

|  | (S5) |
| --- | --- |

|  | (S6) |
| --- | --- |

where and are binary interaction parameters. For the case in which , as it is often assumed, Eq. (S4) reduces to:

|  | (S7) |
| --- | --- |

The energy parameter is computed from:

|  | (S8) |
| --- | --- |

where and , as well as (in Eq. (S7)) are characteristic parameters for a given compound.

The association term is similar as the one use in PC-SAFT (defined in the next section), but in this case the association strength is computed from:

|  | (S9) |
| --- | --- |

where the simplified radial distribution function ([Kontogeorgis et al. 1999](#_ENREF_12); [Kontogeorgis et al. 2006a](#_ENREF_10)) is:

|  | (S10) |
| --- | --- |

and

|  | (S11) |
| --- | --- |

and are the association energy and association volume parameters respectively. Thus for an associating molecule, five pure component parameters are needed: , , , and , which are usually obtained from fitting vapour pressures and liquid density data.

Several combining rules have been proposed for the association strength in the CPA framework, but the so called Elliot combining rule (ECR) and the CR1 have been the most successful ([Folas 2006](#_ENREF_5); [Kontogeorgis et al. 2006a](#_ENREF_10), [2006b](#_ENREF_11)):

CR1:

|  | (S12) |
| --- | --- |

|  | (S13) |
| --- | --- |

ECR:

|  | (S14) |
| --- | --- |

|  | (S15) |
| --- | --- |

## PC-SAFT / PCP-SAFT

The PC-SAFT EoS expressed in terms of is ([Gross and Sadowski 2001](#_ENREF_6), [2002](#_ENREF_7)):

|  | (S16) |
| --- | --- |

Where , , and are the hard-chain formation, dispersion and association contributions respectively, to the Helmholtz free energy of the system.

When the polar term is included in the expansion in equation (S16), the equation is termed PC-polar SAFT, i.e. ([Gross and Vrabec 2006](#_ENREF_8)):

|  | (S17) |
| --- | --- |

### Hard-chain term

The Helmholtz energy due to chain formation for mixtures is given as:

|  | (S18) |
| --- | --- |

where is the number of moles of compound . is the mean segment number in the mixture, computed from:

|  | (S19) |
| --- | --- |

The radial distribution function for the hard-sphere () fluid is given by:

|  | (S20) |
| --- | --- |

And the Helmholtz free energy due to the hard-sphere segments by:

|  | (S21) |
| --- | --- |

with

|  | (S22) |
| --- | --- |

in Eq. (S22) is defined as the total number density of molecules. The temperature-dependent segment diameter is obtained from:

|  | (S23) |
| --- | --- |

### Dispersion term

The dispersion term is:

|  | (S24) |
| --- | --- |

with:

|  | (S25) |
| --- | --- |

and the following power series function of reduced density, , and the mean segment number:

|  | (S26) |
| --- | --- |

|  | (S27) |
| --- | --- |

The coefficients and are functions of according to:

|  | (S28) |
| --- | --- |

|  | (S29) |
| --- | --- |

Values for the coefficients in Eqs. (S28) and (S29) are reported in the original publication ([Gross and Sadowski 2001](#_ENREF_6)).

For mixtures, conventional Berthelot-Lorenz combining rules are employed introducing one adjustable interaction parameter, , to correct for the mixture dispersion energy:

|  | (S30) |
| --- | --- |

|  | (S31) |
| --- | --- |

Three pure component parameters are thus needed to characterize a non-associating molecule: the number of segments per chain (), the temperature- independent segment diameter () and the depth of the potential well (); usually obtained from fitting vapour pressures and saturated liquid density data.

### Association term

The association contributions are computed from:

|  | (S32) |
| --- | --- |

where is the fraction of molecules of component that are not bonded at the association site , given by the following implicit equation:

|  | (S33) |
| --- | --- |

The term can be seen as a strength of association computed from:

|  | (S34) |
| --- | --- |

The radial distribution function for the segments, , in Eq. (S34) is approximated by that of the hard-sphere fluid expression, i.e.:

|  | (S35) |
| --- | --- |

The association term introduces two additional pure component parameters: the association volume, , and the association energy, , between site and site of component , also treated as adjustable parameters. Combining rules of Wolbach and Sandler are used for mixtures ([Gross and Sadowski 2002](#_ENREF_7)).

|  | (S36) |
| --- | --- |

|  | (S37) |
| --- | --- |

### Polar term

The dipolar contributions in PCP-SAFT are given by ([Gross and Vrabec 2006](#_ENREF_8)):

|  | (S38) |
| --- | --- |

where and are second and third-order perturbation terms:

|  | (S39) |
| --- | --- |

|  | (S40) |
| --- | --- |

where is the number of dipolar segments in a molecule . and are power series of the reduced density, according to:

|  | (S41) |
| --- | --- |

|  | (S42) |
| --- | --- |

The coefficients , and depend on the chain length as:

|  | (S43) |
| --- | --- |

|  | (S44) |
| --- | --- |

|  | (S45) |
| --- | --- |

with

|  | (S46) |
| --- | --- |

|  | (S47) |
| --- | --- |

The values for the constants in Eqs. (S43) – (S45) are reported in the original publication ([Gross and Vrabec 2006](#_ENREF_8)).

# Experimental data

Table S1. Sources of experimental data used in the fitting procedure and evaluation.

| formic acid | |  | propanoic acid | |
| --- | --- | --- | --- | --- |
| *T* / K | Reference |  | *T* / K | Reference |
| 303.1 | [Udovenko and Aleksandrova (1960)](#_ENREF_23) |  | 303.2 | [Wright and Akhtar (1970)](#_ENREF_25) |
| 318.1 | [Udovenko and Aleksandrova (1960)](#_ENREF_23) |  | 313.1 | [Brazauskiene et al. (1965)](#_ENREF_3) |
| 323.1 | [Campbell and Campbell (1934)](#_ENREF_4) |  | 343.2 | [Miyamoto et al. (2001)](#_ENREF_15) |
| 328.1 | [Tunik and Zharov (1980)](#_ENREF_22) |  | 373.1 | [Rafflenbeul and Hartmann (1978)](#_ENREF_16) |
| 333.1 | [Udovenko and Aleksandrova (1960)](#_ENREF_23) |  | 423.2 | [Román-Ramírez et al. (2015)](#_ENREF_18) |
| 353.1 | [Vrevskii and Glagoleva (1927)](#_ENREF_24) |  | 453.2 | [Román-Ramírez et al. (2015)](#_ENREF_18) |
| 388.2 | [Sommer et al. (2016)](#_ENREF_21) |  | 483.2 | [Román-Ramírez et al. (2015)](#_ENREF_18) |
| 398.2 | [Sommer et al. (2016)](#_ENREF_21) |  |  |  |
| acetic acid |  |  | butanoic acid | |
| *T* / K | Reference |  | *T* / K | Reference |
| 293.2 | [Lazeeva and Markuzin (1973)](#_ENREF_13) |  | 303.2 | [Wright and Akhtar (1970)](#_ENREF_25) |
| 303.2 | [Wright and Akhtar (1970)](#_ENREF_25) |  |  |  |
| 313.2 | [Lazeeva and Markuzin (1973)](#_ENREF_13) |  | *P* / bar | Reference |
| 343.2 | [Miyamoto et al. (2001)](#_ENREF_15) |  | 0.1333 | [Rivenq (1962)](#_ENREF_17) |
| 363.0 | [Arich and Tagliavini (1958)](#_ENREF_2) |  | 0.5333 | [Rivenq (1962)](#_ENREF_17) |
| 373.1 | [Achary and Narasingrao (1947)](#_ENREF_1) |  | 1.0132 | [Rivenq (1962)](#_ENREF_17) |
| 412.6 | [Román-Ramírez and Leeke (2016)](#_ENREF_19) |  |  |  |
| 443.2 | [Román-Ramírez and Leeke (2016)](#_ENREF_19) |  |  |  |
| 483.2 | [Román-Ramírez and Leeke (2016)](#_ENREF_19) |  |  |  |
|  |  |  |  |  |

# Calculated deviations and binary interaction parameters

Table S2. Deviations (, and ) for predictions () with the EoS studied.a,b

| CPA-CR1 |  |  |  |  |  |  |  |  |  |  |  |  |
| --- | --- | --- | --- | --- | --- | --- | --- | --- | --- | --- | --- | --- |
| formic acid | 1A-2B | | 1A-3B | | 1A-4C | | 2B-2B | | 2B-3B | | 2B-4C | |
| *T* / K | *P* / % | *y1* | *P* / % | *y1* | *P* / % | *y1* | *P* / % | *y1* | *P* / % | *y1* | *P* / % | *y1* |
| 303.1 | 44.81 | 0.13 | 15.27 | 0.09 | 43.38 | 0.12 | 86.68 | 0.18 | 105.77 | 0.11 | 61.62 | 0.13 |
| 318.1 | 37.00 | 0.09 | 13.02 | 0.09 | 40.84 | 0.09 | 70.53 | 0.12 | 86.85 | 0.06 | 52.91 | 0.09 |
| 323.1 | 31.44 | 0.09 | 12.58 | 0.12 | 33.78 | 0.09 | 61.02 | 0.13 | 67.27 | 0.07 | 44.97 | 0.09 |
| 328.1 | 28.69 | 0.06 | 10.07 | 0.11 | 31.71 | 0.06 | 57.33 | 0.10 | 58.29 | 0.05 | 42.17 | 0.06 |
| 333.1 | 29.25 | 0.05 | 9.65 | 0.09 | 33.62 | 0.05 | 56.69 | 0.08 | 68.61 | 0.05 | 43.25 | 0.06 |
| 353.1 | 28.18 | 0.03 | 7.42 | 0.08 | 36.92 | 0.02 | 53.60 | 0.03 | 73.02 | 0.07 | 43.32 | 0.01 |
| 388.2 | 17.89 | 0.07 | 4.00 | 0.02 | 28.29 | 0.10 | 34.90 | 0.11 | 46.54 | 0.11 | 28.79 | 0.10 |
| 398.2 | 15.65 | 0.06 | 2.86 | 0.02 | 26.58 | 0.10 | 31.11 | 0.11 | 40.19 | 0.11 | 25.92 | 0.09 |
| Average | 29.11 | 0.07 | 9.36 | 0.08 | 34.39 | 0.08 | 56.48 | 0.11 | 68.32 | 0.08 | 42.87 | 0.08 |
| acetic acid | 1A-2B | | 1A-3B | | 1A-4C | | 2B-2B | | 2B-3B | | 2B-4C | |
| *T* / K | *P* / % | *y1* | *P* / % | *y1* | *P* / % | *y1* | *P* / % | *y1* | *P* / % | *y1* | *P* / % | *y1* |
| 293.2 | 74.00 | 0.21 | 24.34 | 0.10 | 42.35 | 0.15 | 75.52 | 0.23 | 67.42 | 0.22 | 31.74 | 0.13 |
| 303.2 | 91.54 | 0.23 | 35.46 | 0.11 | 58.80 | 0.17 | 92.23 | 0.24 | 82.71 | 0.22 | 45.12 | 0.14 |
| 313.2 | 49.93 | 0.17 | 17.38 | 0.09 | 35.41 | 0.14 | 56.51 | 0.21 | 48.11 | 0.20 | 25.25 | 0.13 |
| 343.2 | 34.26 | 0.16 | 13.98 | 0.07 | 24.99 | 0.11 | 39.36 | 0.18 | 30.39 | 0.15 | 17.09 | 0.09 |
| 363.0 | 29.31 | 0.11 | 12.56 | 0.06 | 28.96 | 0.10 | 35.20 | 0.14 | 28.95 | 0.12 | 18.49 | 0.09 |
| 373.1 | 28.75 | 0.06 | 9.88 | 0.05 | 33.47 | 0.07 | 35.42 | 0.09 | 28.92 | 0.09 | 21.17 | 0.07 |
| 412.6 | 15.22 |  | 8.45 |  | 20.51 |  | 17.58 |  | 14.21 |  | 10.74 |  |
| 443.2 | 10.91 |  | 7.54 |  | 17.11 |  | 11.53 |  | 9.94 |  | 8.14 |  |
| 483.2 | 8.22 |  | 5.63 |  | 16.73 |  | 9.08 |  | 7.57 |  | 7.41 |  |
| Average | 38.01 | 0.15 | 15.02 | 0.08 | 30.93 | 0.12 | 41.38 | 0.18 | 35.36 | 0.17 | 20.57 | 0.11 |
| propanoic acid | 1A-2B | | 1A-3B | | 1A-4C | | 2B-2B | | 2B-3B | | 2B-4C | |
| *T* / K | *P* / % | *y1* | *P* / % | *y1* | *P* / % | *y1* | *P* / % | *y1* | *P* / % | *y1* | *P* / % | *y1* |
| 303.2 | 35.80 | 0.14 | 60.87 | 0.12 | 75.40 | 0.11 | 128.62 | 0.18 | 130.38 | 0.17 | 49.97 | 0.07 |
| 313.1 | 42.43 | 0.18 | 46.65 | 0.22 | 33.53 | 0.14 | 95.29 | 0.31 | 112.51 | 0.31 | 15.91 | 0.07 |
| 343.2 | 23.06 | 0.10 | 20.20 | 0.12 | 26.23 | 0.11 | 39.43 | 0.16 | 31.24 | 0.15 | 13.23 | 0.06 |
| 373.1 | 17.29 | 0.06 | 15.86 | 0.06 | 24.10 | 0.08 | 26.05 | 0.11 | 28.11 | 0.11 | 9.05 | 0.05 |
| 423.2 | 18.87 | 0.09 | 15.43 | 0.09 | 21.44 | 0.11 | 16.39 | 0.07 | 11.11 | 0.07 | 10.91 | 0.07 |
| 453.2 | 15.23 | 0.12 | 14.34 | 0.12 | 18.05 | 0.13 | 12.35 | 0.10 | 13.08 | 0.10 | 10.18 | 0.10 |
| 483.2 | 11.73 | 0.17 | 12.53 | 0.17 | 14.67 | 0.17 | 9.13 | 0.15 | 10.27 | 0.15 | 8.29 | 0.15 |
| Average | 23.49 | 0.12 | 26.55 | 0.13 | 30.49 | 0.12 | 46.75 | 0.15 | 48.10 | 0.15 | 16.79 | 0.08 |
| butanoic acid | 1A-2B | | 1A-3B | | 1A-4C | | 2B-2B | | 2B-3B | | 2B-4C | |
| *T* / K | *P* / % | *y1* | *P* / % | *y1* | *P* / % | *y1* | *P* / % | *y1* | *P* / % | *y1* | *P* / % | *y1* |
| 303.2 | 86.12 | 0.13 | 51.95 | 0.09 | 70.63 | 0.10 | 106.84 | 0.15 | 73.91 | 0.17 | 44.86 | 0.08 |
| Average | 86.12 | 0.13 | 51.95 | 0.09 | 70.63 | 0.10 | 106.84 | 0.15 | 73.91 | 0.17 | 44.86 | 0.08 |
|  | 1A-2B | | 1A-3B | | 1A-4C | | 2B-2B | | 2B-3B | | 2B-4C | |
| *P* / bar | *T* | *y1* | *T* | *y1* | *T* | *y1* | *T* | *y1* | *T* | *y1* | *T* | *y1* |
| 0.1333 | 9.17 | 0.16 | 36.36 | 0.14 | 6.39 | 0.09 | 11.05 | 0.18 | 26.49 | 0.40 | 3.67 | 0.06 |
| 0.5333 | 8.10 | 0.11 | 23.14 | 0.12 | 6.80 | 0.07 | 8.50 | 0.12 | 28.40 | 0.13 | 3.76 | 0.05 |
| 1.0132 | 7.06 | 0.10 | 16.30 | 0.11 | 6.35 | 0.07 | 7.15 | 0.10 | 20.04 | 0.10 | 3.35 | 0.04 |
| Average | 8.11 | 0.12 | 25.27 | 0.12 | 6.52 | 0.08 | 8.90 | 0.13 | 24.97 | 0.21 | 3.59 | 0.05 |
| Overall average | 33.02 | 0.11 | 17.92 | 0.10 | 33.50 | 0.11 | 50.34 | 0.14 | 51.01 | 0.13 | 27.62 | 0.09 |

Table S2. Continuation.

| CPA-ECR |  |  |  |  |  |  |  |  |  |  |  |  |
| --- | --- | --- | --- | --- | --- | --- | --- | --- | --- | --- | --- | --- |
| formic acid | 1A-2B | | 1A-3B | | 1A-4C | | 2B-2B | | 2B-3B | | 2B-4C | |
| *T* / K | *P* / % | *y1* | *P* / % | *y1* | *P* / % | *y1* | *P* / % | *y1* | *P* / % | *y1* | *P* / % | *y1* |
| 303.1 | 47.86 | 0.14 | 16.41 | 0.09 | 47.42 | 0.13 | 92.80 | 0.18 | 109.21 | 0.12 | 67.85 | 0.14 |
| 318.1 | 39.43 | 0.09 | 14.72 | 0.09 | 42.98 | 0.10 | 75.39 | 0.13 | 89.52 | 0.07 | 58.34 | 0.10 |
| 323.1 | 33.38 | 0.10 | 13.52 | 0.11 | 36.55 | 0.09 | 65.49 | 0.14 | 69.68 | 0.08 | 49.62 | 0.10 |
| 328.1 | 30.59 | 0.07 | 11.32 | 0.11 | 34.54 | 0.07 | 61.71 | 0.11 | 60.63 | 0.06 | 46.78 | 0.07 |
| 333.1 | 31.23 | 0.05 | 10.96 | 0.09 | 36.70 | 0.06 | 60.82 | 0.09 | 70.83 | 0.05 | 48.02 | 0.07 |
| 353.1 | 30.41 | 0.02 | 8.99 | 0.07 | 39.97 | 0.01 | 57.53 | 0.04 | 75.43 | 0.07 | 48.48 | 0.02 |
| 388.2 | 19.35 | 0.07 | 5.31 | 0.03 | 30.66 | 0.11 | 37.95 | 0.12 | 48.18 | 0.12 | 32.79 | 0.11 |
| 398.2 | 17.03 | 0.06 | 4.12 | 0.02 | 28.83 | 0.10 | 33.98 | 0.12 | 41.74 | 0.11 | 29.74 | 0.10 |
| Average | 31.16 | 0.08 | 10.67 | 0.08 | 37.21 | 0.08 | 60.71 | 0.12 | 70.65 | 0.09 | 47.70 | 0.09 |
| acetic acid | 1A-2B | | 1A-3B | | 1A-4C | | 2B-2B | | 2B-3B | | 2B-4C | |
| *T* / K | *P* / % | *y1* | *P* / % | *y1* | *P* / % | *y1* | *P* / % | *y1* | *P* / % | *y1* | *P* / % | *y1* |
| 293.2 | 88.99 | 0.23 | 31.53 | 0.11 | 55.55 | 0.18 | 93.57 | 0.26 | 82.81 | 0.26 | 47.87 | 0.18 |
| 303.2 | 87.82 | 0.39 | 44.44 | 0.12 | 72.27 | 0.20 | 112.53 | 0.27 | 98.49 | 0.25 | 62.50 | 0.18 |
| 313.2 | 60.83 | 0.19 | 22.61 | 0.10 | 47.03 | 0.16 | 71.70 | 0.25 | 62.41 | 0.24 | 40.56 | 0.17 |
| 343.2 | 41.26 | 0.18 | 15.96 | 0.07 | 31.35 | 0.13 | 51.11 | 0.22 | 41.83 | 0.20 | 26.82 | 0.13 |
| 363.0 | 35.55 | 0.13 | 15.26 | 0.06 | 36.60 | 0.12 | 45.67 | 0.17 | 38.59 | 0.15 | 29.79 | 0.12 |
| 373.1 | 35.42 | 0.07 | 15.54 | 0.04 | 42.33 | 0.09 | 46.05 | 0.11 | 39.20 | 0.10 | 34.33 | 0.10 |
| 412.6 | 17.44 |  | 9.17 |  | 24.21 |  | 23.90 |  | 19.46 |  | 18.31 |  |
| 443.2 | 12.00 |  | 7.30 |  | 19.61 |  | 16.59 |  | 12.99 |  | 13.72 |  |
| 483.2 | 9.37 |  | 5.57 |  | 19.66 |  | 13.43 |  | 10.48 |  | 13.25 |  |
| Average | 43.19 | 0.20 | 18.59 | 0.09 | 38.74 | 0.15 | 52.73 | 0.21 | 45.14 | 0.20 | 31.91 | 0.14 |
| propanoic acid | 1A-2B | | 1A-3B | | 1A-4C | | 2B-2B | | 2B-3B | | 2B-4C | |
| *T* / K | *P* / % | *y1* | *P* / % | *y1* | *P* / % | *y1* | *P* / % | *y1* | *P* / % | *y1* | *P* / % | *y1* |
| 303.2 | 57.75 | 0.18 | 84.51 | 0.13 | 102.55 | 0.15 | 176.96 | 0.23 | 159.27 | 0.22 | 83.96 | 0.11 |
| 313.1 | 35.68 | 0.12 | 58.46 | 0.25 | 46.45 | 0.18 | 71.69 | 0.37 | 62.78 | 0.35 | 30.51 | 0.11 |
| 343.2 | 24.27 | 0.12 | 25.55 | 0.12 | 26.85 | 0.11 | 58.20 | 0.22 | 49.46 | 0.21 | 15.77 | 0.09 |
| 373.1 | 22.96 | 0.06 | 17.14 | 0.07 | 33.16 | 0.10 | 43.01 | 0.15 | 37.69 | 0.13 | 21.84 | 0.09 |
| 423.2 | 19.83 | 0.09 | 14.75 | 0.08 | 21.96 | 0.10 | 20.69 | 0.07 | 19.26 | 0.07 | 12.74 | 0.06 |
| 453.2 | 14.36 | 0.11 | 12.26 | 0.11 | 18.47 | 0.12 | 14.21 | 0.09 | 13.29 | 0.09 | 10.50 | 0.09 |
| 483.2 | 10.27 | 0.16 | 9.55 | 0.16 | 14.93 | 0.16 | 9.41 | 0.14 | 9.07 | 0.14 | 7.62 | 0.14 |
| Average | 26.45 | 0.12 | 31.74 | 0.13 | 37.77 | 0.13 | 56.31 | 0.18 | 50.12 | 0.17 | 26.13 | 0.10 |
| butanoic acid | 1A-2B | | 1A-3B | | 1A-4C | | 2B-2B | | 2B-3B | | 2B-4C | |
| *T* / K | *P* / % | *y1* | *P* / % | *y1* | *P* / % | *y1* | *P* / % | *y1* | *P* / % | *y1* | *P* / % | *y1* |
| 303.2 | 115.34 | 0.15 | 71.18 | 0.11 | 105.23 | 0.12 | 159.85 | 0.19 | 88.95 | 0.23 | 89.54 | 0.10 |
| Average | 115.34 | 0.15 | 71.18 | 0.11 | 105.23 | 0.12 | 159.85 | 0.19 | 88.95 | 0.23 | 89.54 | 0.10 |
|  | 1A-2B | | 1A-3B | | 1A-4C | | 2B-2B | | 2B-3B | | 2B-4C | |
| *P* / bar | *T* | *y1* | *T* | *y1* | *T* | *y1* | *T* | *y1* | *T* | *y1* | *T* | *y1* |
| 0.1333 | 10.65 | 0.17 | 46.48 | 0.14 | 7.31 | 0.07 | 16.53 | 0.20 | 37.29 | 0.16 | 5.93 | 0.05 |
| 0.5333 | 8.77 | 0.12 | 31.02 | 0.10 | 7.40 | 0.07 | 12.91 | 0.16 | 25.82 | 0.11 | 5.86 | 0.06 |
| 1.0132 | 7.61 | 0.10 | 21.92 | 0.09 | 7.59 | 0.07 | 11.59 | 0.15 | 19.76 | 0.09 | 5.78 | 0.06 |
| Average | 9.01 | 0.13 | 33.14 | 0.11 | 7.43 | 0.07 | 13.67 | 0.17 | 27.62 | 0.12 | 5.86 | 0.06 |
| Overall average | 37.54 | 0.13 | 21.84 | 0.10 | 40.63 | 0.12 | 60.57 | 0.17 | 56.45 | 0.15 | 37.65 | 0.11 |

Table S2. Continuation.

| PC-SAFT |  |  |  |  |  |  |  |  |  |  |  |  |  |  |
| --- | --- | --- | --- | --- | --- | --- | --- | --- | --- | --- | --- | --- | --- | --- |
| formic acid | 1A-2B | | 1A-3B | | 1A-4C | | 2B-2B | | 2B-3B | | 2B-4C | | Non-assoc. | |
| *T* / K | *P* / % | *y1* | *P* / % | *y1* | *P* / % | *y1* | *P* / % | *y1* | *P* / % | *y1* | *P* / % | *y1* | *P* / % | *y1* |
| 303.1 | 9.26 | 0.11 | 17.45 | 0.17 | 9.37 | 0.12 | 55.05 | 0.11 | 44.54 | 0.09 | 47.69 | 0.11 | 25.73 | 0.09 |
| 318.1 | 7.91 | 0.11 | 16.10 | 0.16 | 8.81 | 0.12 | 45.61 | 0.08 | 36.48 | 0.07 | 40.73 | 0.08 | 23.46 | 0.09 |
| 323.1 | 8.00 | 0.12 | 12.48 | 0.18 | 9.08 | 0.13 | 38.20 | 0.08 | 30.36 | 0.07 | 33.84 | 0.07 | 20.37 | 0.10 |
| 328.1 | 5.92 | 0.13 | 11.67 | 0.18 | 6.80 | 0.12 | 35.21 | 0.05 | 27.47 | 0.05 | 31.17 | 0.06 | 18.48 | 0.09 |
| 333.1 | 4.89 | 0.10 | 14.80 | 0.16 | 6.16 | 0.10 | 35.73 | 0.05 | 27.70 | 0.04 | 32.21 | 0.05 | 18.71 | 0.08 |
| 353.1 | 2.66 | 0.09 | 18.18 | 0.15 | 6.07 | 0.09 | 34.51 | 0.02 | 25.95 | 0.04 | 32.59 | 0.03 | 18.73 | 0.08 |
| 388.2 | 1.38 | 0.01 | 16.44 | 0.04 | 3.66 | 0.03 | 20.75 | 0.08 | 13.92 | 0.06 | 19.78 | 0.08 | 9.72 | 0.03 |
| 398.2 | 1.92 | 0.01 | 16.78 | 0.04 | 3.06 | 0.03 | 18.05 | 0.07 | 11.49 | 0.05 | 17.36 | 0.07 | 7.64 | 0.03 |
| Average | 5.24 | 0.09 | 15.49 | 0.14 | 6.63 | 0.09 | 35.39 | 0.07 | 27.24 | 0.06 | 31.92 | 0.07 | 17.86 | 0.07 |
| acetic acid | 1A-2B | | 1A-3B | | 1A-4C | | 2B-2B | | 2B-3B | | 2B-4C | | Non-assoc. | |
| *T* / K | *P* / % | *y1* | *P* / % | *y1* | *P* / % | *y1* | *P* / % | *y1* | *P* / % | *y1* | *P* / % | *y1* | *P* / % | *y1* |
| 293.2 | 12.83 | 0.04 | 34.69 | 0.14 | 12.68 | 0.04 | 20.66 | 0.09 | 12.73 | 0.07 | 15.64 | 0.08 | 23.45 | 0.13 |
| 303.2 | 4.63 | 0.03 | 28.44 | 0.14 | 5.90 | 0.04 | 31.07 | 0.10 | 22.16 | 0.07 | 26.59 | 0.08 | 36.25 | 0.13 |
| 313.2 | 15.15 | 0.04 | 34.53 | 0.12 | 12.77 | 0.04 | 13.34 | 0.09 | 7.10 | 0.07 | 11.42 | 0.08 | 18.18 | 0.12 |
| 343.2 | 8.81 | 0.03 | 19.63 | 0.08 | 7.23 | 0.03 | 7.42 | 0.05 | 3.85 | 0.03 | 6.55 | 0.05 | 13.11 | 0.06 |
| 363.0 | 13.89 | 0.04 | 29.00 | 0.10 | 10.86 | 0.03 | 6.10 | 0.04 | 1.94 | 0.03 | 6.36 | 0.05 | 12.41 | 0.06 |
| 373.1 | 16.78 | 0.05 | 35.96 | 0.12 | 11.21 | 0.05 | 6.71 | 0.04 | 1.29 | 0.03 | 8.69 | 0.05 | 12.81 | 0.04 |
| 412.6 | 12.60 |  | 23.41 |  | 9.48 |  | 2.17 |  | 4.74 |  | 1.07 |  | 5.03 |  |
| 443.2 | 13.06 |  | 22.11 |  | 9.74 |  | 2.16 |  | 5.74 |  | 1.51 |  | 3.15 |  |
| 483.2 | 12.31 |  | 21.09 |  | 8.05 |  | 2.45 |  | 6.38 |  | 0.80 |  | 3.05 |  |
| Average | 12.23 | 0.04 | 27.65 | 0.11 | 9.77 | 0.04 | 10.23 | 0.07 | 7.33 | 0.05 | 8.74 | 0.06 | 14.16 | 0.09 |
| propanoic acid | 1A-2B | | 1A-3B | | 1A-4C | | 2B-2B | | 2B-3B | | 2B-4C | | Non-assoc. | |
| *T* / K | *P* / % | *y1* | *P* / % | *y1* | *P* / % | *y1* | *P* / % | *y1* | *P* / % | *y1* | *P* / % | *y1* | *P* / % | *y1* |
| 303.2 | 6.79 | 0.04 | 22.23 | 0.10 | 11.33 | 0.02 | 21.07 | 0.02 | 9.46 | 0.03 | 20.48 | 0.02 | 55.65 | 0.08 |
| 313.1 | 14.65 | 0.04 | 28.63 | 0.09 | 10.95 | 0.02 | 7.48 | 0.02 | 11.19 | 0.03 | 6.75 | 0.02 | 18.81 | 0.09 |
| 343.2 | 22.33 | 0.08 | 32.09 | 0.12 | 17.87 | 0.05 | 15.93 | 0.04 | 19.85 | 0.06 | 14.08 | 0.03 | 11.87 | 0.06 |
| 373.1 | 19.87 | 0.04 | 32.09 | 0.09 | 12.10 | 0.02 | 12.74 | 0.02 | 18.60 | 0.03 | 9.23 | 0.02 | 6.82 | 0.04 |
| 423.2 | 21.31 | 0.11 | 30.46 | 0.14 | 15.02 | 0.09 | 16.59 | 0.08 | 20.32 | 0.10 | 13.31 | 0.07 | 9.76 | 0.06 |
| 453.2 | 21.81 | 0.14 | 30.38 | 0.17 | 14.58 | 0.12 | 17.21 | 0.12 | 21.14 | 0.13 | 12.89 | 0.10 | 11.23 | 0.10 |
| 483.2 | 21.67 | 0.18 | 29.58 | 0.20 | 13.60 | 0.16 | 17.10 | 0.16 | 21.19 | 0.17 | 12.08 | 0.15 | 13.30 | 0.14 |
| Average | 18.35 | 0.09 | 29.35 | 0.13 | 13.63 | 0.07 | 15.44 | 0.07 | 17.39 | 0.08 | 12.69 | 0.06 | 18.21 | 0.08 |
| butanoic acid | 1A-2B | | 1A-3B | | 1A-4C | | 2B-2B | | 2B-3B | | 2B-4C | | Non-assoc. | |
| *T* / K | *P* / % | *y1* | *P* / % | *y1* | *P* / % | *y1* | *P* / % | *y1* | *P* / % | *y1* | *P* / % | *y1* | *P* / % | *y1* |
| 303.2 | 7.12 | 0.05 | 26.20 | 0.04 | 13.18 | 0.06 | 8.32 | 0.06 | 5.69 | 0.05 | 11.76 | 0.06 | 51.07 | 0.09 |
| Average | 7.12 | 0.05 | 26.20 | 0.04 | 13.18 | 0.06 | 8.32 | 0.06 | 5.69 | 0.05 | 11.76 | 0.06 | 51.07 | 0.09 |
|  | 1A-2B | | 1A-3B | | 1A-4C | | 2B-2B | | 2B-3B | | 2B-4C | | Non-assoc. | |
| *P* / bar | *T* | *y1* | *T* | *y1* | *T* | *y1* | *T* | *y1* | *T* | *y1* | *T* | *y1* | *T* | *y1* |
| 0.1333 | 6.67 | 0.08 | 11.56 | 0.11 | 3.36 | 0.05 | 5.30 | 0.06 | 7.68 | 0.08 | 3.65 | 0.04 | 3.52 | 0.06 |
| 0.5333 | 8.30 | 0.07 | 12.94 | 0.10 | 4.27 | 0.04 | 6.93 | 0.06 | 9.36 | 0.08 | 4.59 | 0.03 | 3.56 | 0.04 |
| 1.0132 | 8.54 | 0.07 | 12.90 | 0.10 | 4.26 | 0.04 | 7.24 | 0.06 | 9.64 | 0.07 | 4.68 | 0.03 | 3.45 | 0.04 |
| Average | 7.84 | 0.07 | 12.47 | 0.10 | 3.96 | 0.04 | 6.49 | 0.06 | 8.89 | 0.08 | 4.31 | 0.03 | 3.51 | 0.05 |
| Overall average | 11.50 | 0.07 | 24.18 | 0.12 | 9.98 | 0.07 | 19.67 | 0.07 | 16.45 | 0.06 | 17.38 | 0.06 | 17.95 | 0.08 |

Table S2. Continuation.

| PCP-SAFT |  |  |  |  |  |  |  |  |  |  |  |  |  |  |
| --- | --- | --- | --- | --- | --- | --- | --- | --- | --- | --- | --- | --- | --- | --- |
| formic acid | 1A-2B | | 1A-3B | | 1A-4C | | 2B-2B | | 2B-3B | | 2B-4C | | Non-assoc. | |
| *T* / K | *P* / % | *y1* | *P* / % | *y1* | *P* / % | *y1* | *P* / % | *y1* | *P* / % | *y1* | *P* / % | *y1* | *P* / % | *y1* |
| 303.1 | 31.32 | 0.12 | 10.08 | 0.13 | 37.43 | 0.14 | 104.80 | 0.20 | 97.50 | 0.18 | 92.36 | 0.18 | 34.40 | 0.10 |
| 318.1 | 26.35 | 0.10 | 8.58 | 0.13 | 32.19 | 0.11 | 84.14 | 0.14 | 77.74 | 0.13 | 75.73 | 0.13 | 30.63 | 0.09 |
| 323.1 | 21.68 | 0.10 | 7.97 | 0.14 | 26.06 | 0.11 | 71.78 | 0.15 | 65.70 | 0.13 | 63.72 | 0.13 | 25.53 | 0.09 |
| 328.1 | 19.07 | 0.09 | 7.27 | 0.14 | 23.35 | 0.09 | 67.55 | 0.12 | 61.44 | 0.10 | 59.86 | 0.10 | 23.31 | 0.09 |
| 333.1 | 19.55 | 0.08 | 6.19 | 0.12 | 24.73 | 0.08 | 67.08 | 0.10 | 60.76 | 0.09 | 60.59 | 0.09 | 24.35 | 0.07 |
| 353.1 | 19.11 | 0.07 | 3.14 | 0.12 | 25.78 | 0.06 | 63.65 | 0.04 | 56.96 | 0.03 | 58.85 | 0.03 | 25.55 | 0.07 |
| 388.2 | 9.17 | 0.04 | 4.70 | 0.02 | 14.45 | 0.06 | 41.32 | 0.14 | 35.48 | 0.12 | 37.96 | 0.13 | 13.70 | 0.05 |
| 398.2 | 7.19 | 0.04 | 5.52 | 0.02 | 12.35 | 0.06 | 36.99 | 0.13 | 31.37 | 0.11 | 33.99 | 0.12 | 11.37 | 0.05 |
| Average | 19.18 | 0.08 | 6.68 | 0.10 | 24.54 | 0.09 | 67.16 | 0.13 | 60.87 | 0.11 | 60.38 | 0.11 | 23.61 | 0.08 |
| acetic acid | 1A-2B | | 1A-3B | | 1A-4C | | 2B-2B | | 2B-3B | | 2B-4C | | Non-assoc. | |
| *T* / K | *P* / % | *y1* | *P* / % | *y1* | *P* / % | *y1* | *P* / % | *y1* | *P* / % | *y1* | *P* / % | *y1* | *P* / % | *y1* |
| 293.2 | 21.26 | 0.09 | 5.65 | 0.02 | 30.56 | 0.13 | 71.47 | 0.23 | 61.25 | 0.21 | 69.07 | 0.23 | 37.03 | 0.17 |
| 303.2 | 30.51 | 0.08 | 7.40 | 0.04 | 40.79 | 0.12 | 84.03 | 0.23 | 70.45 | 0.20 | 81.51 | 0.22 | 50.75 | 0.17 |
| 313.2 | 13.37 | 0.06 | 8.65 | 0.03 | 22.77 | 0.10 | 55.23 | 0.21 | 41.70 | 0.18 | 55.29 | 0.21 | 30.30 | 0.16 |
| 343.2 | 4.99 | 0.03 | 6.45 | 0.02 | 10.06 | 0.05 | 30.72 | 0.15 | 23.15 | 0.12 | 30.28 | 0.14 | 19.01 | 0.09 |
| 363.0 | 3.17 | 0.02 | 11.54 | 0.03 | 10.31 | 0.05 | 31.47 | 0.13 | 23.16 | 0.11 | 32.49 | 0.13 | 19.75 | 0.08 |
| 373.1 | 3.82 | 0.03 | 13.53 | 0.05 | 13.83 | 0.05 | 35.17 | 0.10 | 26.02 | 0.09 | 37.45 | 0.11 | 22.47 | 0.07 |
| 412.6 | 3.03 |  | 12.21 |  | 3.19 |  | 15.09 |  | 9.24 |  | 16.42 |  | 8.90 |  |
| 443.2 | 5.64 |  | 13.12 |  | 2.16 |  | 9.56 |  | 5.34 |  | 10.72 |  | 4.13 |  |
| 483.2 | 6.16 |  | 12.95 |  | 1.44 |  | 7.10 |  | 3.24 |  | 8.94 |  | 1.72 |  |
| Average | 10.22 | 0.05 | 10.17 | 0.03 | 15.01 | 0.08 | 37.76 | 0.17 | 29.28 | 0.15 | 38.02 | 0.18 | 21.56 | 0.12 |
| propanoic acid | 1A-2B | | 1A-3B | | 1A-4C | | 2B-2B | | 2B-3B | | 2B-4C | | Non-assoc. | |
| *T* / K | *P* / % | *y1* | *P* / % | *y1* | *P* / % | *y1* | *P* / % | *y1* | *P* / % | *y1* | *P* / % | *y1* | *P* / % | *y1* |
| 303.2 | 61.18 | 0.08 | 25.56 | 0.02 | 96.19 | 0.13 | 100.11 | 0.13 | 80.78 | 0.11 | 114.93 | 0.15 | 89.64 | 0.12 |
| 313.1 | 13.97 | 0.06 | 5.03 | 0.02 | 31.09 | 0.10 | 35.21 | 0.12 | 24.31 | 0.09 | 39.99 | 0.12 | 32.78 | 0.12 |
| 343.2 | 9.19 | 0.04 | 14.11 | 0.04 | 15.47 | 0.08 | 14.71 | 0.09 | 10.65 | 0.06 | 19.77 | 0.11 | 13.56 | 0.07 |
| 373.1 | 5.47 | 0.04 | 10.21 | 0.02 | 20.40 | 0.08 | 17.45 | 0.08 | 10.04 | 0.06 | 25.01 | 0.10 | 15.44 | 0.07 |
| 423.2 | 7.02 | 0.07 | 15.02 | 0.09 | 11.75 | 0.08 | 7.95 | 0.05 | 6.48 | 0.05 | 10.04 | 0.05 | 7.77 | 0.05 |
| 453.2 | 8.91 | 0.11 | 16.10 | 0.12 | 9.34 | 0.11 | 5.78 | 0.08 | 6.59 | 0.09 | 7.55 | 0.08 | 6.24 | 0.08 |
| 483.2 | 10.04 | 0.15 | 16.93 | 0.16 | 7.04 | 0.15 | 3.84 | 0.13 | 7.53 | 0.14 | 4.42 | 0.13 | 6.26 | 0.12 |
| Average | 16.54 | 0.08 | 14.71 | 0.07 | 27.33 | 0.10 | 26.44 | 0.10 | 20.91 | 0.09 | 31.67 | 0.11 | 24.53 | 0.09 |
| butanoic acid | 1A-2B | | 1A-3B | | 1A-4C | | 2B-2B | | 2B-3B | | 2B-4C | | Non-assoc. | |
| *T* / K | *P* / % | *y1* | *P* / % | *y1* | *P* / % | *y1* | *P* / % | *y1* | *P* / % | *y1* | *P* / % | *y1* | *P* / % | *y1* |
| 303.2 | 74.25 | 0.09 | 36.36 | 0.07 | 140.30 | 0.13 | 97.07 | 0.11 | 72.55 | 0.09 | 135.81 | 0.12 | 98.80 | 0.11 |
| Average | 74.25 | 0.09 | 36.36 | 0.07 | 140.30 | 0.13 | 97.07 | 0.11 | 72.55 | 0.09 | 135.81 | 0.12 | 98.80 | 0.11 |
|  | 1A-2B | | 1A-3B | | 1A-4C | | 2B-2B | | 2B-3B | | 2B-4C | | Non-assoc. | |
| *P* / bar | *T* | *y1* | *T* | *y1* | *T* | *y1* | *T* | *y1* | *T* | *y1* | *T* | *y1* | *T* | *y1* |
| 0.1333 | 3.88 | 0.04 | 2.04 | 0.04 | 8.68 | 0.07 | 5.39 | 0.04 | 3.75 | 0.04 | 8.33 | 0.07 | 6.03 | 0.06 |
| 0.5333 | 3.05 | 0.03 | 2.53 | 0.03 | 7.68 | 0.07 | 3.89 | 0.04 | 2.67 | 0.03 | 7.30 | 0.07 | 4.47 | 0.04 |
| 1.0132 | 2.29 | 0.03 | 2.76 | 0.03 | 7.19 | 0.07 | 3.09 | 0.03 | 1.88 | 0.03 | 6.61 | 0.06 | 3.52 | 0.04 |
| Average | 3.07 | 0.04 | 2.44 | 0.03 | 7.85 | 0.07 | 4.12 | 0.04 | 2.77 | 0.03 | 7.41 | 0.07 | 4.67 | 0.05 |
| Overall average | 17.42 | 0.07 | 11.37 | 0.07 | 26.52 | 0.09 | 46.37 | 0.13 | 38.78 | 0.11 | 47.31 | 0.13 | 26.14 | 0.10 |
| a Overall average values computed from isothermal data only.  b Values for CPA-CR1 2B-2B taken from ([Román-Ramírez and Leeke 2020](#_ENREF_20)), except isobaric data. | | | | | | | | | | | | | | |

Table S3. Deviations (, and ) for correlations () with the EoS studied.a,b

| CPA-CR1 |  |  |  |  |  |  |  |  |  |  |  |  |
| --- | --- | --- | --- | --- | --- | --- | --- | --- | --- | --- | --- | --- |
| formic acid | 1A-2B | | 1A-3B | | 1A-4C | | 2B-2B | | 2B-3B | | 2B-4C | |
| *T* / K | *P* / % | *y1* | *P* / % | *y1* | *P* / % | *y1* | *P* / % | *y1* | *P* / % | *y1* | *P* / % | *y1* |
| 303.1 | 4.38 | 0.11 | 6.30 | 0.12 | 4.61 | 0.12 | 9.80 | 0.13 | 11.45 | 0.14 | 10.67 | 0.13 |
| 318.1 | 4.39 | 0.11 | 5.14 | 0.12 | 6.13 | 0.11 | 8.73 | 0.12 | 9.93 | 0.14 | 9.30 | 0.13 |
| 323.1 | 5.90 | 0.13 | 6.04 | 0.14 | 5.04 | 0.13 | 9.08 | 0.13 | 7.61 | 0.16 | 8.95 | 0.14 |
| 328.1 | 3.89 | 0.13 | 4.58 | 0.13 | 3.19 | 0.13 | 7.18 | 0.13 | 5.80 | 0.16 | 7.38 | 0.13 |
| 333.1 | 2.93 | 0.10 | 3.72 | 0.11 | 2.12 | 0.10 | 6.04 | 0.11 | 6.12 | 0.13 | 6.34 | 0.11 |
| 353.1 | 1.94 | 0.09 | 2.67 | 0.09 | 2.70 | 0.08 | 4.18 | 0.11 | 5.68 | 0.12 | 4.85 | 0.11 |
| 388.2 | 0.96 | 0.02 | 1.17 | 0.01 | 1.39 | 0.02 | 2.88 | 0.02 | 1.92 | 0.01 | 3.28 | 0.03 |
| 398.2 | 0.84 | 0.02 | 1.15 | 0.01 | 1.19 | 0.02 | 2.83 | 0.02 | 1.74 | 0.01 | 3.08 | 0.02 |
| Average | 3.15 | 0.09 | 3.85 | 0.09 | 3.30 | 0.09 | 6.34 | 0.10 | 6.28 | 0.11 | 6.73 | 0.10 |
| acetic acid | 1A-2B | | 1A-3B | | 1A-4C | | 2B-2B | | 2B-3B | | 2B-4C | |
| *T* / K | *P* / % | *y1* | *P* / % | *y1* | *P* / % | *y1* | *P* / % | *y1* | *P* / % | *y1* | *P* / % | *y1* |
| 293.2 | 7.73 | 0.05 | 9.73 | 0.06 | 5.54 | 0.04 | 4.89 | 0.03 | 7.68 | 0.05 | 3.48 | 0.02 |
| 303.2 | 7.13 | 0.04 | 7.05 | 0.04 | 6.41 | 0.04 | 6.36 | 0.02 | 7.59 | 0.04 | 5.33 | 0.02 |
| 313.2 | 8.15 | 0.05 | 9.73 | 0.06 | 6.57 | 0.05 | 5.79 | 0.03 | 6.58 | 0.05 | 4.30 | 0.03 |
| 343.2 | 5.34 | 0.04 | 6.49 | 0.04 | 4.34 | 0.03 | 3.09 | 0.02 | 6.19 | 0.03 | 2.44 | 0.02 |
| 363.0 | 5.63 | 0.04 | 6.86 | 0.04 | 4.21 | 0.03 | 3.15 | 0.02 | 4.87 | 0.04 | 1.95 | 0.02 |
| 373.1 | 4.52 | 0.03 | 5.64 | 0.04 | 3.22 | 0.04 | 2.13 | 0.02 | 3.00 | 0.04 | 1.20 | 0.03 |
| 412.6 | 4.68 |  | 5.53 |  | 3.73 |  | 2.81 |  | 4.83 |  | 2.12 |  |
| 443.2 | 5.50 |  | 6.33 |  | 4.94 |  | 3.54 |  | 6.25 |  | 2.81 |  |
| 483.2 | 4.02 |  | 4.71 |  | 3.37 |  | 2.46 |  | 3.72 |  | 1.96 |  |
| Average | 5.85 | 0.04 | 6.90 | 0.05 | 4.70 | 0.04 | 3.80 | 0.03 | 5.63 | 0.04 | 2.84 | 0.02 |
| propanoic acid | 1A-2B | | 1A-3B | | 1A-4C | | 2B-2B | | 2B-3B | | 2B-4C | |
| *T* / K | *P* / % | *y1* | *P* / % | *y1* | *P* / % | *y1* | *P* / % | *y1* | *P* / % | *y1* | *P* / % | *y1* |
| 303.2 | 15.09 | 0.06 | 12.60 | 0.06 | 13.46 | 0.04 | 10.75 | 0.04 | 23.93 | 0.05 | 11.53 | 0.03 |
| 313.1 | 11.61 | 0.05 | 14.13 | 0.05 | 10.34 | 0.03 | 11.03 | 0.04 | 15.79 | 0.04 | 9.55 | 0.03 |
| 343.2 | 16.33 | 0.08 | 17.46 | 0.09 | 17.02 | 0.07 | 15.10 | 0.06 | 11.84 | 0.06 | 14.81 | 0.05 |
| 373.1 | 11.97 | 0.04 | 13.36 | 0.05 | 8.50 | 0.03 | 9.51 | 0.03 | 8.93 | 0.04 | 7.12 | 0.03 |
| 423.2 | 13.00 | 0.09 | 13.80 | 0.09 | 10.47 | 0.09 | 11.28 | 0.07 | 10.74 | 0.06 | 9.70 | 0.07 |
| 453.2 | 13.20 | 0.12 | 14.18 | 0.12 | 11.56 | 0.13 | 10.95 | 0.10 | 12.31 | 0.10 | 9.84 | 0.10 |
| 483.2 | 11.52 | 0.17 | 12.51 | 0.17 | 10.31 | 0.17 | 9.00 | 0.15 | 10.25 | 0.15 | 8.27 | 0.15 |
| Average | 13.25 | 0.09 | 14.01 | 0.09 | 11.67 | 0.08 | 11.09 | 0.07 | 13.40 | 0.07 | 10.12 | 0.07 |
| butanoic acid | 1A-2B | | 1A-3B | | 1A-4C | | 2B-2B | | 2B-3B | | 2B-4C | |
| *T* / K | *P* / % | *y1* | *P* / % | *y1* | *P* / % | *y1* | *P* / % | *y1* | *P* / % | *y1* | *P* / % | *y1* |
| 303.2 | 12.80 | 0.04 | 16.68 | 0.04 | 10.14 | 0.04 | 11.24 | 0.05 | 12.57 | 0.05 | 7.13 | 0.05 |
| Average | 12.80 | 0.04 | 16.68 | 0.04 | 10.14 | 0.04 | 11.24 | 0.05 | 12.57 | 0.05 | 7.13 | 0.05 |
|  | 1A-2B | | 1A-3B | | 1A-4C | | 2B-2B | | 2B-3B | | 2B-4C | |
| *P* / bar | *T* | *y1* | *T* | *y1* | *T* | *y1* | *T* | *y1* | *T* | *y1* | *T* | *y1* |
| 0.1333 | 3.89 | 0.06 | 11.11 | 0.11 | 3.12 | 0.06 | 3.27 | 0.05 | 12.70 | 0.11 | 2.39 | 0.05 |
| 0.5333 | 3.55 | 0.04 | 3.65 | 0.04 | 3.24 | 0.05 | 2.90 | 0.04 | 4.36 | 0.05 | 2.54 | 0.03 |
| 1.0132 | 3.91 | 0.05 | 3.99 | 0.03 | 2.94 | 0.04 | 3.20 | 0.05 | 3.12 | 0.03 | 2.55 | 0.03 |
| Average | 3.78 | 0.05 | 6.25 | 0.06 | 3.10 | 0.05 | 3.12 | 0.04 | 6.73 | 0.06 | 2.49 | 0.04 |
| Overall average | 7.34 | 0.07 | 8.30 | 0.08 | 6.42 | 0.07 | 6.95 | 0.07 | 8.29 | 0.07 | 6.30 | 0.07 |

Table S3. Continuation.

| CPA-ECR |  |  |  |  |  |  |  |  |  |  |  |  |
| --- | --- | --- | --- | --- | --- | --- | --- | --- | --- | --- | --- | --- |
| formic acid | 1A-2B | | 1A-3B | | 1A-4C | | 2B-2B | | 2B-3B | | 2B-4C | |
| *T* / K | *P* / % | *y1* | *P* / % | *y1* | *P* / % | *y1* | *P* / % | *y1* | *P* / % | *y1* | *P* / % | *y1* |
| 303.1 | 4.53 | 0.11 | 5.90 | 0.12 | 4.31 | 0.12 | 10.02 | 0.13 | 11.13 | 0.14 | 11.35 | 0.13 |
| 318.1 | 4.35 | 0.11 | 5.38 | 0.12 | 4.81 | 0.11 | 8.96 | 0.12 | 9.58 | 0.14 | 9.94 | 0.13 |
| 323.1 | 5.98 | 0.13 | 6.33 | 0.14 | 5.46 | 0.13 | 9.20 | 0.13 | 7.22 | 0.15 | 9.30 | 0.14 |
| 328.1 | 3.97 | 0.13 | 4.69 | 0.14 | 3.72 | 0.13 | 7.35 | 0.13 | 5.85 | 0.15 | 7.84 | 0.13 |
| 333.1 | 2.94 | 0.11 | 3.62 | 0.11 | 2.68 | 0.11 | 6.25 | 0.11 | 5.91 | 0.13 | 6.92 | 0.12 |
| 353.1 | 1.58 | 0.09 | 1.61 | 0.09 | 1.32 | 0.08 | 4.41 | 0.11 | 5.65 | 0.11 | 5.57 | 0.11 |
| 388.2 | 0.74 | 0.01 | 0.68 | 0.01 | 1.16 | 0.02 | 3.08 | 0.02 | 1.88 | 0.01 | 3.86 | 0.03 |
| 398.2 | 0.72 | 0.01 | 0.62 | 0.01 | 1.12 | 0.02 | 3.01 | 0.02 | 2.10 | 0.01 | 3.56 | 0.03 |
| Average | 3.10 | 0.09 | 3.60 | 0.09 | 3.07 | 0.09 | 6.54 | 0.10 | 6.16 | 0.11 | 7.29 | 0.10 |
| acetic acid | 1A-2B | | 1A-3B | | 1A-4C | | 2B-2B | | 2B-3B | | 2B-4C | |
| *T* / K | *P* / % | *y1* | *P* / % | *y1* | *P* / % | *y1* | *P* / % | *y1* | *P* / % | *y1* | *P* / % | *y1* |
| 293.2 | 5.97 | 0.04 | 7.27 | 0.05 | 5.23 | 0.02 | 3.74 | 0.02 | 6.38 | 0.04 | 2.74 | 0.02 |
| 303.2 | 8.27 | 0.03 | 6.72 | 0.03 | 5.93 | 0.02 | 7.06 | 0.02 | 8.01 | 0.03 | 8.40 | 0.03 |
| 313.2 | 6.34 | 0.04 | 7.49 | 0.04 | 5.49 | 0.03 | 4.54 | 0.03 | 7.22 | 0.04 | 2.78 | 0.02 |
| 343.2 | 4.28 | 0.03 | 5.04 | 0.03 | 2.54 | 0.02 | 2.37 | 0.02 | 5.02 | 0.03 | 1.16 | 0.02 |
| 363.0 | 4.12 | 0.03 | 4.97 | 0.03 | 2.70 | 0.02 | 2.06 | 0.02 | 4.10 | 0.03 | 0.91 | 0.02 |
| 373.1 | 2.71 | 0.03 | 3.49 | 0.03 | 1.21 | 0.03 | 1.13 | 0.02 | 1.56 | 0.03 | 2.27 | 0.03 |
| 412.6 | 3.69 |  | 4.22 |  | 2.35 |  | 2.08 |  | 2.96 |  | 0.95 |  |
| 443.2 | 4.43 |  | 5.04 |  | 3.52 |  | 2.69 |  | 3.66 |  | 1.60 |  |
| 483.2 | 3.09 |  | 3.54 |  | 2.23 |  | 1.70 |  | 2.38 |  | 0.82 |  |
| Average | 4.77 | 0.03 | 5.31 | 0.03 | 3.47 | 0.02 | 3.04 | 0.02 | 4.59 | 0.03 | 2.40 | 0.02 |
| propanoic acid | 1A-2B | | 1A-3B | | 1A-4C | | 2B-2B | | 2B-3B | | 2B-4C | |
| *T* / K | *P* / % | *y1* | *P* / % | *y1* | *P* / % | *y1* | *P* / % | *y1* | *P* / % | *y1* | *P* / % | *y1* |
| 303.2 | 13.93 | 0.04 | 14.18 | 0.04 | 17.78 | 0.02 | 13.26 | 0.02 | 16.51 | 0.03 | 16.38 | 0.01 |
| 313.1 | 9.65 | 0.03 | 11.81 | 0.04 | 6.73 | 0.02 | 8.66 | 0.03 | 7.81 | 0.03 | 7.43 | 0.02 |
| 343.2 | 14.14 | 0.06 | 14.67 | 0.07 | 13.20 | 0.05 | 13.14 | 0.05 | 10.94 | 0.04 | 11.60 | 0.02 |
| 373.1 | 7.47 | 0.04 | 9.50 | 0.03 | 4.37 | 0.02 | 6.50 | 0.03 | 5.73 | 0.04 | 2.87 | 0.03 |
| 423.2 | 10.95 | 0.08 | 11.33 | 0.08 | 7.44 | 0.09 | 9.17 | 0.06 | 9.89 | 0.06 | 5.80 | 0.06 |
| 453.2 | 10.91 | 0.12 | 11.27 | 0.11 | 7.98 | 0.12 | 8.77 | 0.09 | 9.49 | 0.09 | 5.75 | 0.10 |
| 483.2 | 8.99 | 0.16 | 9.50 | 0.16 | 6.72 | 0.17 | 6.88 | 0.14 | 7.59 | 0.14 | 4.39 | 0.14 |
| Average | 10.86 | 0.08 | 11.75 | 0.08 | 9.18 | 0.07 | 9.48 | 0.06 | 9.71 | 0.06 | 7.75 | 0.05 |
| butanoic acid | 1A-2B | | 1A-3B | | 1A-4C | | 2B-2B | | 2B-3B | | 2B-4C | |
| *T* / K | *P* / % | *y1* | *P* / % | *y1* | *P* / % | *y1* | *P* / % | *y1* | *P* / % | *y1* | *P* / % | *y1* |
| 303.2 | 7.54 | 0.05 | 10.56 | 0.05 | 7.97 | 0.05 | 5.82 | 0.05 | 14.49 | 0.05 | 4.21 | 0.06 |
| Average | 7.54 | 0.05 | 10.56 | 0.05 | 7.97 | 0.05 | 5.82 | 0.05 | 14.49 | 0.05 | 4.21 | 0.06 |
|  | 1A-2B | | 1A-3B | | 1A-4C | | 2B-2B | | 2B-3B | | 2B-4C | |
| *P* / bar | *T* | *y1* | *T* | *y1* | *T* | *y1* | *T* | *y1* | *T* | *y1* | *T* | *y1* |
| 0.1333 | 2.57 | 0.04 | 8.11 | 0.09 | 1.43 | 0.03 | 2.15 | 0.04 | 3.16 | 0.08 | 0.87 | 0.02 |
| 0.5333 | 2.51 | 0.03 | 4.35 | 0.05 | 1.52 | 0.02 | 2.00 | 0.03 | 2.00 | 0.04 | 0.82 | 0.01 |
| 1.0132 | 2.64 | 0.04 | 3.01 | 0.04 | 1.27 | 0.02 | 2.07 | 0.03 | 1.71 | 0.03 | 0.62 | 0.01 |
| Average | 2.57 | 0.04 | 5.16 | 0.06 | 1.41 | 0.02 | 2.07 | 0.03 | 2.29 | 0.05 | 0.77 | 0.01 |
| Overall average | 6.05 | 0.07 | 6.78 | 0.07 | 5.12 | 0.06 | 6.08 | 0.06 | 6.92 | 0.07 | 5.54 | 0.06 |

Table S3. Continuation.

| PC-SAFT |  |  |  |  |  |  |  |  |  |  |  |  |  |  |
| --- | --- | --- | --- | --- | --- | --- | --- | --- | --- | --- | --- | --- | --- | --- |
| formic acid | 1A-2B | | 1A-3B | | 1A-4C | | 2B-2B | | 2B-3B | | 2B-4C | | Non-assoc. | |
| *T* / K | *P* / % | *y1* | *P* / % | *y1* | *P* / % | *y1* | *P* / % | *y1* | *P* / % | *y1* | *P* / % | *y1* | *P* / % | *y1* |
| 303.1 | 5.75 | 0.12 | 7.89 | 0.14 | 7.89 | 0.12 | 10.06 | 0.13 | 8.98 | 0.13 | 11.31 | 0.13 | 9.50 | 0.13 |
| 318.1 | 5.46 | 0.11 | 7.29 | 0.13 | 7.01 | 0.12 | 8.51 | 0.12 | 7.54 | 0.12 | 9.66 | 0.13 | 8.91 | 0.13 |
| 323.1 | 6.16 | 0.13 | 7.00 | 0.14 | 7.18 | 0.13 | 8.35 | 0.13 | 7.53 | 0.13 | 9.02 | 0.14 | 8.74 | 0.14 |
| 328.1 | 4.56 | 0.13 | 6.31 | 0.14 | 5.78 | 0.13 | 6.93 | 0.13 | 6.03 | 0.13 | 7.75 | 0.13 | 7.76 | 0.14 |
| 333.1 | 3.38 | 0.11 | 4.99 | 0.12 | 4.98 | 0.11 | 5.64 | 0.11 | 4.72 | 0.11 | 6.71 | 0.12 | 6.64 | 0.12 |
| 353.1 | 1.44 | 0.10 | 3.55 | 0.11 | 2.68 | 0.10 | 4.27 | 0.11 | 3.30 | 0.10 | 5.36 | 0.11 | 6.23 | 0.12 |
| 388.2 | 1.36 | 0.01 | 2.67 | 0.02 | 2.49 | 0.02 | 2.98 | 0.02 | 2.17 | 0.02 | 3.91 | 0.03 | 3.62 | 0.03 |
| 398.2 | 1.59 | 0.01 | 2.72 | 0.02 | 2.53 | 0.02 | 2.87 | 0.02 | 2.14 | 0.02 | 3.73 | 0.03 | 3.58 | 0.03 |
| Average | 3.71 | 0.09 | 5.30 | 0.10 | 5.07 | 0.09 | 6.20 | 0.10 | 5.30 | 0.10 | 7.18 | 0.10 | 6.87 | 0.10 |
| acetic acid | 1A-2B | | 1A-3B | | 1A-4C | | 2B-2B | | 2B-3B | | 2B-4C | | Non-assoc. | |
| *T* / K | *P* / % | *y1* | *P* / % | *y1* | *P* / % | *y1* | *P* / % | *y1* | *P* / % | *y1* | *P* / % | *y1* | *P* / % | *y1* |
| 293.2 | 2.96 | 0.02 | 1.16 | 0.01 | 2.81 | 0.03 | 2.64 | 0.02 | 2.50 | 0.03 | 1.65 | 0.02 | 7.45 | 0.03 |
| 303.2 | 9.15 | 0.02 | 10.19 | 0.02 | 10.45 | 0.04 | 8.84 | 0.03 | 8.60 | 0.03 | 9.50 | 0.04 | 4.59 | 0.03 |
| 313.2 | 3.41 | 0.02 | 1.76 | 0.01 | 2.19 | 0.02 | 3.41 | 0.03 | 3.53 | 0.03 | 2.09 | 0.03 | 6.03 | 0.03 |
| 343.2 | 2.06 | 0.01 | 1.29 | 0.00 | 2.12 | 0.02 | 1.90 | 0.01 | 2.18 | 0.02 | 1.25 | 0.02 | 3.03 | 0.02 |
| 363.0 | 1.88 | 0.01 | 0.40 | 0.00 | 2.27 | 0.02 | 1.66 | 0.02 | 1.89 | 0.02 | 1.34 | 0.02 | 2.38 | 0.02 |
| 373.1 | 1.46 | 0.02 | 1.68 | 0.02 | 3.07 | 0.03 | 1.62 | 0.02 | 1.52 | 0.03 | 2.64 | 0.03 | 1.24 | 0.02 |
| 412.6 | 2.08 |  | 1.17 |  | 1.93 |  | 1.68 |  | 2.25 |  | 1.18 |  | 2.81 |  |
| 443.2 | 2.81 |  | 1.93 |  | 2.41 |  | 2.14 |  | 2.77 |  | 1.50 |  | 2.90 |  |
| 483.2 | 1.78 |  | 1.18 |  | 1.54 |  | 1.40 |  | 1.96 |  | 0.97 |  | 2.13 |  |
| Average | 3.07 | 0.02 | 2.31 | 0.01 | 3.20 | 0.03 | 2.81 | 0.02 | 3.02 | 0.03 | 2.46 | 0.03 | 3.62 | 0.03 |
| propanoic acid | 1A-2B | | 1A-3B | | 1A-4C | | 2B-2B | | 2B-3B | | 2B-4C | | Non-assoc. | |
| *T* / K | *P* / % | *y1* | *P* / % | *y1* | *P* / % | *y1* | *P* / % | *y1* | *P* / % | *y1* | *P* / % | *y1* | *P* / % | *y1* |
| 303.2 | 12.97 | 0.03 | 13.95 | 0.03 | 20.33 | 0.02 | 15.24 | 0.02 | 16.56 | 0.02 | 18.16 | 0.02 | 12.50 | 0.02 |
| 313.1 | 9.10 | 0.03 | 9.88 | 0.03 | 5.91 | 0.02 | 7.94 | 0.02 | 8.09 | 0.02 | 7.08 | 0.02 | 8.90 | 0.03 |
| 343.2 | 14.98 | 0.05 | 14.08 | 0.05 | 12.54 | 0.04 | 13.51 | 0.04 | 14.06 | 0.05 | 11.72 | 0.02 | 11.15 | 0.05 |
| 373.1 | 7.41 | 0.02 | 6.95 | 0.03 | 4.13 | 0.03 | 5.70 | 0.03 | 6.21 | 0.03 | 3.34 | 0.03 | 6.72 | 0.03 |
| 423.2 | 9.61 | 0.08 | 9.21 | 0.07 | 6.77 | 0.08 | 8.19 | 0.06 | 8.89 | 0.06 | 5.42 | 0.06 | 10.07 | 0.05 |
| 453.2 | 9.80 | 0.11 | 9.35 | 0.11 | 7.34 | 0.11 | 8.02 | 0.09 | 8.57 | 0.09 | 5.40 | 0.09 | 9.63 | 0.08 |
| 483.2 | 8.27 | 0.16 | 7.85 | 0.15 | 6.29 | 0.16 | 6.38 | 0.14 | 6.75 | 0.14 | 4.27 | 0.14 | 7.62 | 0.12 |
| Average | 10.31 | 0.07 | 10.18 | 0.07 | 9.04 | 0.06 | 9.28 | 0.06 | 9.88 | 0.06 | 7.91 | 0.05 | 9.51 | 0.05 |
| butanoic acid | 1A-2B | | 1A-3B | | 1A-4C | | 2B-2B | | 2B-3B | | 2B-4C | | Non-assoc. | |
| *T* / K | *P* / % | *y1* | *P* / % | *y1* | *P* / % | *y1* | *P* / % | *y1* | *P* / % | *y1* | *P* / % | *y1* | *P* / % | *y1* |
| 303.2 | 6.59 | 0.05 | 8.72 | 0.05 | 7.65 | 0.05 | 4.55 | 0.05 | 5.71 | 0.05 | 4.58 | 0.06 | 6.58 | 0.05 |
| Average | 6.59 | 0.05 | 8.72 | 0.05 | 7.65 | 0.05 | 4.55 | 0.05 | 5.71 | 0.05 | 4.58 | 0.06 | 6.58 | 0.05 |
|  | 1A-2B | | 1A-3B | | 1A-4C | | 2B-2B | | 2B-3B | | 2B-4C | | Non-assoc. | |
| *P* / bar | *T* | *y1* | *T* | *y1* | *T* | *y1* | *T* | *y1* | *T* | *y1* | *T* | *y1* | *T* | *y1* |
| 0.1333 | 2.35 | 0.04 | 2.70 | 0.04 | 1.71 | 0.04 | 1.85 | 0.03 | 3.03 | 0.05 | 1.00 | 0.02 | 2.42 | 0.04 |
| 0.5333 | 2.29 | 0.03 | 2.17 | 0.03 | 1.92 | 0.03 | 1.74 | 0.02 | 2.96 | 0.04 | 1.02 | 0.02 | 2.19 | 0.03 |
| 1.0132 | 2.29 | 0.03 | 2.34 | 0.03 | 1.62 | 0.02 | 1.70 | 0.02 | 2.63 | 0.03 | 0.81 | 0.01 | 2.33 | 0.03 |
| Average | 2.31 | 0.03 | 2.40 | 0.03 | 1.75 | 0.03 | 1.77 | 0.03 | 2.87 | 0.04 | 0.95 | 0.02 | 2.31 | 0.03 |
| Overall average | 5.44 | 0.06 | 5.73 | 0.06 | 5.61 | 0.06 | 5.78 | 0.06 | 5.78 | 0.06 | 5.58 | 0.06 | 6.43 | 0.06 |

Table S3. Continuation.

| PCP-SAFT |  |  |  |  |  |  |  |  |  |  |  |  |  |  |
| --- | --- | --- | --- | --- | --- | --- | --- | --- | --- | --- | --- | --- | --- | --- |
| formic acid | 1A-2B | | 1A-3B | | 1A-4C | | 2B-2B | | 2B-3B | | 2B-4C | | Non-assoc. | |
| *T* / K | *P* / % | *y1* | *P* / % | *y1* | *P* / % | *y1* | *P* / % | *y1* | *P* / % | *y1* | *P* / % | *y1* | *P* / % | *y1* |
| 303.1 | 8.32 | 0.13 | 9.74 | 0.14 | 9.14 | 0.13 | 12.11 | 0.13 | 13.09 | 0.12 | 12.89 | 0.13 | 11.63 | 0.13 |
| 318.1 | 7.34 | 0.12 | 8.21 | 0.14 | 8.00 | 0.13 | 10.30 | 0.13 | 11.00 | 0.12 | 10.99 | 0.13 | 10.89 | 0.13 |
| 323.1 | 7.69 | 0.13 | 8.01 | 0.14 | 7.48 | 0.14 | 9.40 | 0.14 | 10.33 | 0.13 | 9.74 | 0.14 | 9.71 | 0.14 |
| 328.1 | 6.13 | 0.14 | 7.11 | 0.15 | 6.82 | 0.14 | 8.22 | 0.14 | 8.12 | 0.13 | 8.83 | 0.13 | 9.01 | 0.13 |
| 333.1 | 5.20 | 0.11 | 6.05 | 0.13 | 5.89 | 0.12 | 7.19 | 0.12 | 6.96 | 0.11 | 7.80 | 0.12 | 8.32 | 0.12 |
| 353.1 | 3.00 | 0.10 | 3.43 | 0.11 | 2.98 | 0.10 | 5.69 | 0.12 | 6.01 | 0.11 | 6.14 | 0.12 | 7.83 | 0.12 |
| 388.2 | 2.70 | 0.02 | 3.42 | 0.02 | 3.05 | 0.02 | 4.17 | 0.03 | 3.70 | 0.03 | 4.66 | 0.03 | 5.25 | 0.04 |
| 398.2 | 2.76 | 0.02 | 3.36 | 0.02 | 2.93 | 0.02 | 4.05 | 0.03 | 3.52 | 0.02 | 4.52 | 0.03 | 4.86 | 0.03 |
| Average | 5.39 | 0.10 | 6.17 | 0.11 | 5.79 | 0.10 | 7.64 | 0.10 | 7.84 | 0.10 | 8.20 | 0.10 | 8.44 | 0.11 |
| acetic acid | 1A-2B | | 1A-3B | | 1A-4C | | 2B-2B | | 2B-3B | | 2B-4C | | Non-assoc. | |
| *T* / K | *P* / % | *y1* | *P* / % | *y1* | *P* / % | *y1* | *P* / % | *y1* | *P* / % | *y1* | *P* / % | *y1* | *P* / % | *y1* |
| 293.2 | 2.03 | 0.02 | 2.71 | 0.02 | 4.13 | 0.04 | 1.98 | 0.03 | 3.20 | 0.03 | 3.47 | 0.04 | 5.84 | 0.03 |
| 303.2 | 10.47 | 0.03 | 10.61 | 0.04 | 11.62 | 0.05 | 9.43 | 0.04 | 10.88 | 0.05 | 10.21 | 0.05 | 6.68 | 0.04 |
| 313.2 | 1.74 | 0.01 | 1.48 | 0.02 | 2.71 | 0.03 | 2.30 | 0.03 | 2.11 | 0.03 | 2.78 | 0.04 | 3.87 | 0.03 |
| 343.2 | 1.39 | 0.01 | 1.40 | 0.01 | 2.54 | 0.02 | 1.37 | 0.02 | 0.82 | 0.02 | 2.07 | 0.03 | 1.32 | 0.02 |
| 363.0 | 1.33 | 0.01 | 1.44 | 0.01 | 2.78 | 0.02 | 1.40 | 0.03 | 1.12 | 0.03 | 2.32 | 0.03 | 1.10 | 0.02 |
| 373.1 | 2.11 | 0.02 | 2.59 | 0.02 | 3.35 | 0.03 | 2.63 | 0.03 | 1.88 | 0.03 | 3.64 | 0.04 | 3.00 | 0.03 |
| 412.6 | 1.41 |  | 1.40 |  | 2.20 |  | 1.13 |  | 1.52 |  | 1.67 |  | 0.83 |  |
| 443.2 | 1.96 |  | 1.90 |  | 2.51 |  | 1.42 |  | 2.09 |  | 1.54 |  | 1.30 |  |
| 483.2 | 1.25 |  | 1.21 |  | 1.64 |  | 0.97 |  | 1.25 |  | 1.22 |  | 1.08 |  |
| Average | 2.63 | 0.02 | 2.75 | 0.02 | 3.72 | 0.03 | 2.51 | 0.03 | 2.76 | 0.03 | 3.21 | 0.04 | 2.78 | 0.03 |
| propanoic acid | 1A-2B | | 1A-3B | | 1A-4C | | 2B-2B | | 2B-3B | | 2B-4C | | Non-assoc. | |
| *T* / K | *P* / % | *y1* | *P* / % | *y1* | *P* / % | *y1* | *P* / % | *y1* | *P* / % | *y1* | *P* / % | *y1* | *P* / % | *y1* |
| 303.2 | 19.16 | 0.02 | 19.28 | 0.02 | 16.68 | 0.03 | 18.23 | 0.02 | 19.62 | 0.02 | 17.45 | 0.03 | 15.22 | 0.01 |
| 313.1 | 6.49 | 0.02 | 6.29 | 0.02 | 8.54 | 0.02 | 7.22 | 0.02 | 6.30 | 0.02 | 8.51 | 0.02 | 7.87 | 0.02 |
| 343.2 | 12.04 | 0.04 | 12.20 | 0.04 | 13.38 | 0.04 | 11.67 | 0.02 | 11.07 | 0.03 | 11.93 | 0.02 | 10.27 | 0.03 |
| 373.1 | 3.77 | 0.03 | 4.27 | 0.03 | 4.63 | 0.03 | 3.11 | 0.03 | 3.73 | 0.03 | 3.71 | 0.04 | 1.91 | 0.03 |
| 423.2 | 6.95 | 0.07 | 7.28 | 0.07 | 6.72 | 0.07 | 5.26 | 0.05 | 6.15 | 0.05 | 5.34 | 0.06 | 6.32 | 0.05 |
| 453.2 | 7.34 | 0.10 | 7.85 | 0.10 | 6.85 | 0.11 | 5.22 | 0.09 | 6.41 | 0.09 | 4.29 | 0.09 | 6.38 | 0.08 |
| 483.2 | 6.08 | 0.15 | 7.05 | 0.15 | 6.23 | 0.15 | 4.04 | 0.13 | 5.02 | 0.13 | 3.53 | 0.13 | 5.08 | 0.12 |
| Average | 8.83 | 0.06 | 9.17 | 0.06 | 9.00 | 0.06 | 7.82 | 0.05 | 8.33 | 0.05 | 7.82 | 0.06 | 7.58 | 0.05 |
| butanoic acid | 1A-2B | | 1A-3B | | 1A-4C | | 2B-2B | | 2B-3B | | 2B-4C | | Non-assoc. | |
| *T* / K | *P* / % | *y1* | *P* / % | *y1* | *P* / % | *y1* | *P* / % | *y1* | *P* / % | *y1* | *P* / % | *y1* | *P* / % | *y1* |
| 303.2 | 7.18 | 0.05 | 7.02 | 0.05 | 11.55 | 0.06 | 6.99 | 0.06 | 8.06 | 0.05 | 13.14 | 0.05 | 4.80 | 0.06 |
| Average | 7.18 | 0.05 | 7.02 | 0.05 | 11.55 | 0.06 | 6.99 | 0.06 | 8.06 | 0.05 | 13.14 | 0.05 | 4.80 | 0.06 |
|  | 1A-2B | | 1A-3B | | 1A-4C | | 2B-2B | | 2B-3B | | 2B-4C | | Non-assoc. | |
| *P* / bar | *T* | *y1* | *T* | *y1* | *T* | *y1* | *T* | *y1* | *T* | *y1* | *T* | *y1* | *T* | *y1* |
| 0.1333 | 2.20 | 0.04 | 2.22 | 0.04 | 4.17 | 0.04 | 1.03 | 0.02 | 1.45 | 0.03 | 2.35 | 0.02 | 1.13 | 0.03 |
| 0.5333 | 2.06 | 0.03 | 2.30 | 0.03 | 1.82 | 0.02 | 1.09 | 0.02 | 1.34 | 0.02 | 1.69 | 0.02 | 0.97 | 0.02 |
| 1.0132 | 2.02 | 0.03 | 2.07 | 0.03 | 1.49 | 0.02 | 0.88 | 0.01 | 1.02 | 0.02 | 1.51 | 0.02 | 0.90 | 0.01 |
| Average | 2.09 | 0.03 | 2.19 | 0.03 | 2.49 | 0.02 | 1.00 | 0.02 | 1.27 | 0.02 | 1.85 | 0.02 | 1.00 | 0.02 |
| Overall average | 5.43 | 0.06 | 5.81 | 0.07 | 6.17 | 0.07 | 5.82 | 0.06 | 6.16 | 0.06 | 6.49 | 0.07 | 6.02 | 0.06 |
| a Overall average values computed from isothermal data only.  b Values for CPA-CR1 2B-2B taken from ([Román-Ramírez and Leeke 2020](#_ENREF_20)), except isobaric data. | | | | | | | | | | | | | | | |

Table S4. Values of the binary interaction parameter () for the organic acid + water systems with the different EoS studied.a

| CPA-CR1 |  |  |  |  |  |  |  | PC-SAFT |  |  |  |  |  |  |  |
| --- | --- | --- | --- | --- | --- | --- | --- | --- | --- | --- | --- | --- | --- | --- | --- |
| formic acid |  |  |  |  |  |  |  | formic acid |  |  |  |  |  |  |  |
| *T* / K | 1A-2B | 1A-3B | 1A-4C | 2B-2B | 2B-3B | 2B-4C |  | *T* / K | 1A-2B | 1A-3B | 1A-4C | 2B-2B | 2B-3B | 2B-4C | Non-assoc. |
| 303.1 | -0.135 | -0.051 | -0.202 | -0.253 | -0.345 | -0.305 |  | 303.1 | -0.014 | 0.077 | -0.005 | -0.119 | -0.094 | -0.118 | -0.032 |
| 318.1 | -0.131 | -0.044 | -0.202 | -0.261 | -0.367 | -0.326 |  | 318.1 | -0.008 | 0.075 | -0.012 | -0.120 | -0.092 | -0.125 | -0.036 |
| 323.1 | -0.137 | -0.050 | -0.220 | -0.267 | -0.331 | -0.331 |  | 323.1 | -0.014 | 0.074 | -0.020 | -0.122 | -0.095 | -0.123 | -0.037 |
| 328.1 | -0.122 | -0.042 | -0.207 | -0.245 | -0.313 | -0.303 |  | 328.1 | -0.007 | 0.078 | -0.005 | -0.108 | -0.081 | -0.110 | -0.030 |
| 333.1 | -0.122 | -0.036 | -0.207 | -0.249 | -0.333 | -0.312 |  | 333.1 | -0.008 | 0.075 | -0.008 | -0.109 | -0.082 | -0.113 | -0.031 |
| 353.1 | -0.111 | -0.028 | -0.209 | -0.252 | -0.353 | -0.329 |  | 353.1 | -0.006 | 0.069 | -0.023 | -0.108 | -0.077 | -0.118 | -0.033 |
| 388.2 | -0.107 | -0.033 | -0.226 | -0.236 | -0.325 | -0.299 |  | 388.2 | 0.002 | 0.079 | -0.015 | -0.090 | -0.062 | -0.098 | -0.023 |
| 398.2 | -0.099 | -0.026 | -0.220 | -0.222 | -0.299 | -0.299 |  | 398.2 | 0.004 | 0.082 | -0.010 | -0.083 | -0.053 | -0.094 | -0.018 |
| acetic acid |  |  |  |  |  |  |  | acetic acid |  |  |  |  |  |  |  |
| *T* / K | 1A-2B | 1A-3B | 1A-4C | 2B-2B | 2B-3B | 2B-4C |  | *T* / K | 1A-2B | 1A-3B | 1A-4C | 2B-2B | 2B-3B | 2B-4C | Non-assoc. |
| 293.2 | -0.157 | -0.075 | -0.178 | -0.207 | -0.183 | -0.173 |  | 293.2 | 0.028 | 0.108 | 0.031 | -0.050 | -0.032 | -0.044 | -0.034 |
| 303.2 | -0.186 | -0.107 | -0.218 | -0.229 | -0.220 | -0.226 |  | 303.2 | 0.011 | 0.093 | 0.008 | -0.068 | -0.046 | -0.069 | -0.043 |
| 313.2 | -0.145 | -0.064 | -0.182 | -0.189 | -0.170 | -0.168 |  | 313.2 | 0.035 | 0.112 | 0.033 | -0.041 | -0.022 | -0.036 | -0.030 |
| 343.2 | -0.159 | -0.089 | -0.211 | -0.193 | -0.171 | -0.182 |  | 343.2 | 0.035 | 0.110 | 0.039 | -0.037 | -0.015 | -0.035 | -0.030 |
| 363.0 | -0.128 | -0.061 | -0.204 | -0.173 | -0.162 | -0.165 |  | 363.0 | 0.045 | 0.116 | 0.035 | -0.024 | -0.004 | -0.028 | -0.024 |
| 373.1 | -0.112 | -0.045 | -0.197 | -0.153 | -0.134 | -0.150 |  | 373.1 | 0.049 | 0.117 | 0.033 | -0.018 | 0.003 | -0.029 | -0.020 |
| 412.6 | -0.117 | -0.060 | -0.220 | -0.145 | -0.125 | -0.148 |  | 412.6 | 0.056 | 0.123 | 0.046 | -0.007 | 0.016 | -0.010 | -0.012 |
| 443.2 | -0.107 | -0.055 | -0.226 | -0.133 | -0.118 | -0.140 |  | 443.2 | 0.061 | 0.128 | 0.052 | 0.001 | 0.028 | -0.001 | -0.003 |
| 483.2 | -0.083 | -0.038 | -0.240 | -0.108 | -0.088 | -0.140 |  | 483.2 | 0.066 | 0.128 | 0.046 | 0.010 | 0.035 | -0.002 | 0.008 |
| propanoic acid |  |  |  |  |  |  |  | propanoic acid | |  |  |  |  |  |  |
| *T* / K | 1A-2B | 1A-3B | 1A-4C | 2B-2B | 2B-3B | 2B-4C |  | *T* / K | 1A-2B | 1A-3B | 1A-4C | 2B-2B | 2B-3B | 2B-4C | Non-assoc. |
| 303.2 | -0.213 | -0.147 | -0.263 | -0.233 | -0.246 | -0.211 |  | 303.2 | -0.008 | 0.057 | -0.016 | -0.038 | -0.016 | -0.041 | -0.047 |
| 313.1 | -0.167 | -0.109 | -0.165 | -0.182 | -0.201 | -0.111 |  | 313.1 | 0.028 | 0.086 | 0.032 | 0.005 | 0.022 | 0.016 | -0.024 |
| 343.2 | -0.131 | -0.080 | -0.138 | -0.147 | -0.116 | -0.067 |  | 343.2 | 0.049 | 0.102 | 0.042 | 0.028 | 0.041 | 0.034 | -0.011 |
| 373.1 | -0.086 | -0.052 | -0.162 | -0.134 | -0.117 | -0.080 |  | 373.1 | 0.050 | 0.098 | 0.032 | 0.035 | 0.046 | 0.025 | -0.004 |
| 423.2 | -0.096 | -0.054 | -0.178 | -0.096 | -0.075 | -0.065 |  | 423.2 | 0.060 | 0.105 | 0.038 | 0.045 | 0.057 | 0.040 | 0.009 |
| 453.2 | -0.042 | -0.030 | -0.172 | -0.045 | -0.029 | -0.024 |  | 453.2 | 0.075 | 0.115 | 0.037 | 0.060 | 0.075 | 0.042 | 0.018 |
| 483.2 | -0.008 | 0.030 | -0.145 | -0.010 | 0.010 | 0.006 |  | 483.2 | 0.087 | 0.123 | 0.044 | 0.072 | 0.088 | 0.056 | 0.036 |
| butanoic acid |  |  |  |  |  |  |  | butanoic acid | |  |  |  |  |  |  |
| *T* / K | 1A-2B | 1A-3B | 1A-4C | 2B-2B | 2B-3B | 2B-4C |  | *T* / K | 1A-2B | 1A-3B | 1A-4C | 2B-2B | 2B-3B | 2B-4C | Non-assoc. |
| 303.2 | -0.186 | -0.138 | -0.236 | -0.215 | -0.220 | -0.192 |  | 303.2 | -0.005 | 0.047 | -0.033 | -0.017 | -0.001 | -0.026 | -0.048 |

Table S4. Continuation.

| CPA-ECR |  |  |  |  |  |  |  | PCP-SAFT |  |  |  |  |  |  |  |
| --- | --- | --- | --- | --- | --- | --- | --- | --- | --- | --- | --- | --- | --- | --- | --- |
| formic acid |  |  |  |  |  |  |  | formic acid |  |  |  |  |  |  |  |
| *T* / K | 1A-2B | 1A-3B | 1A-4C | 2B-2B | 2B-3B | 2B-4C |  | *T* / K | 1A-2B | 1A-3B | 1A-4C | 2B-2B | 2B-3B | 2B-4C | Non-assoc. |
| 303.1 | -0.141 | -0.055 | -0.213 | -0.262 | -0.349 | -0.323 |  | 303.1 | -0.057 | -0.009 | -0.093 | -0.188 | -0.172 | -0.204 | -0.045 |
| 318.1 | -0.138 | -0.057 | -0.213 | -0.271 | -0.372 | -0.349 |  | 318.1 | -0.058 | -0.017 | -0.081 | -0.194 | -0.176 | -0.214 | -0.052 |
| 323.1 | -0.143 | -0.056 | -0.230 | -0.276 | -0.336 | -0.349 |  | 323.1 | -0.064 | -0.005 | -0.089 | -0.189 | -0.149 | -0.205 | -0.047 |
| 328.1 | -0.130 | -0.047 | -0.213 | -0.255 | -0.320 | -0.324 |  | 328.1 | -0.049 | -0.009 | -0.069 | -0.177 | -0.137 | -0.194 | -0.042 |
| 333.1 | -0.129 | -0.045 | -0.222 | -0.260 | -0.340 | -0.336 |  | 333.1 | -0.050 | -0.004 | -0.073 | -0.181 | -0.162 | -0.199 | -0.045 |
| 353.1 | -0.119 | -0.039 | -0.224 | -0.265 | -0.361 | -0.360 |  | 353.1 | -0.058 | -0.004 | -0.087 | -0.184 | -0.162 | -0.205 | -0.051 |
| 388.2 | -0.114 | -0.039 | -0.240 | -0.248 | -0.325 | -0.321 |  | 388.2 | -0.038 | 0.017 | -0.067 | -0.162 | -0.142 | -0.179 | -0.032 |
| 398.2 | -0.105 | -0.032 | -0.236 | -0.237 | -0.306 | -0.333 |  | 398.2 | -0.030 | 0.024 | -0.060 | -0.155 | -0.132 | -0.172 | -0.027 |
| acetic acid |  |  |  |  |  |  |  | acetic acid |  |  |  |  |  |  |  |
| *T* / K | 1A-2B | 1A-3B | 1A-4C | 2B-2B | 2B-3B | 2B-4C |  | *T* / K | 1A-2B | 1A-3B | 1A-4C | 2B-2B | 2B-3B | 2B-4C | Non-assoc. |
| 293.2 | -0.171 | -0.094 | -0.204 | -0.227 | -0.208 | -0.220 |  | 293.2 | -0.043 | 0.012 | -0.064 | -0.119 | -0.097 | -0.140 | -0.045 |
| 303.2 | -0.198 | -0.124 | -0.260 | -0.256 | -0.246 | -0.281 |  | 303.2 | -0.059 | 0.015 | -0.087 | -0.140 | -0.122 | -0.163 | -0.063 |
| 313.2 | -0.159 | -0.084 | -0.202 | -0.215 | -0.206 | -0.217 |  | 313.2 | -0.031 | 0.018 | -0.059 | -0.108 | -0.088 | -0.128 | -0.044 |
| 343.2 | -0.162 | -0.092 | -0.228 | -0.214 | -0.201 | -0.238 |  | 343.2 | -0.020 | 0.026 | -0.046 | -0.101 | -0.079 | -0.123 | -0.044 |
| 363.0 | -0.145 | -0.078 | -0.226 | -0.201 | -0.188 | -0.221 |  | 363.0 | -0.011 | 0.037 | -0.040 | -0.090 | -0.067 | -0.108 | -0.038 |
| 373.1 | -0.132 | -0.067 | -0.229 | -0.190 | -0.170 | -0.228 |  | 373.1 | -0.009 | 0.039 | -0.041 | -0.089 | -0.066 | -0.110 | -0.036 |
| 412.6 | -0.129 | -0.073 | -0.238 | -0.176 | -0.161 | -0.210 |  | 412.6 | 0.011 | 0.058 | -0.016 | -0.064 | -0.042 | -0.078 | -0.024 |
| 443.2 | -0.119 | -0.068 | -0.234 | -0.160 | -0.143 | -0.200 |  | 443.2 | 0.024 | 0.069 | -0.001 | -0.049 | -0.029 | -0.064 | -0.014 |
| 483.2 | -0.098 | -0.053 | -0.261 | -0.146 | -0.127 | -0.211 |  | 483.2 | 0.032 | 0.075 | -0.002 | -0.041 | -0.019 | -0.056 | -0.005 |
| propanoic acid |  |  |  |  |  |  |  | propanoic acid | |  |  |  |  |  |  |
| *T* / K | 1A-2B | 1A-3B | 1A-4C | 2B-2B | 2B-3B | 2B-4C |  | *T* / K | 1A-2B | 1A-3B | 1A-4C | 2B-2B | 2B-3B | 2B-4C | Non-assoc. |
| 303.2 | -0.235 | -0.170 | -0.278 | -0.272 | -0.264 | -0.281 |  | 303.2 | -0.079 | -0.035 | -0.133 | -0.120 | -0.092 | -0.151 | -0.071 |
| 313.1 | -0.174 | -0.112 | -0.178 | -0.203 | -0.207 | -0.163 |  | 313.1 | -0.031 | 0.006 | -0.073 | -0.061 | -0.048 | -0.088 | -0.039 |
| 343.2 | -0.135 | -0.090 | -0.155 | -0.165 | -0.168 | -0.124 |  | 343.2 | -0.009 | 0.028 | -0.044 | -0.045 | -0.026 | -0.071 | -0.024 |
| 373.1 | -0.098 | -0.074 | -0.193 | -0.158 | -0.168 | -0.151 |  | 373.1 | -0.013 | 0.020 | -0.061 | -0.046 | -0.027 | -0.075 | -0.026 |
| 423.2 | -0.113 | -0.070 | -0.200 | -0.142 | -0.129 | -0.141 |  | 423.2 | 0.002 | 0.033 | -0.036 | -0.022 | -0.005 | -0.038 | -0.010 |
| 453.2 | -0.072 | -0.031 | -0.205 | -0.106 | -0.092 | -0.137 |  | 453.2 | 0.014 | 0.044 | -0.033 | -0.014 | 0.005 | -0.033 | -0.002 |
| 483.2 | -0.042 | -0.005 | -0.194 | -0.077 | -0.060 | -0.106 |  | 483.2 | 0.029 | 0.057 | -0.018 | 0.005 | 0.025 | -0.023 | 0.014 |
| butanoic acid |  |  |  |  |  |  |  | butanoic acid | |  |  |  |  |  |  |
| *T* / K | 1A-2B | 1A-3B | 1A-4C | 2B-2B | 2B-3B | 2B-4C |  | *T* / K | 1A-2B | 1A-3B | 1A-4C | 2B-2B | 2B-3B | 2B-4C | Non-assoc. |
| 303.2 | -0.205 | -0.155 | -0.286 | -0.257 | -0.177 | -0.272 |  | 303.2 | -0.091 | -0.056 | -0.148 | -0.110 | -0.090 | -0.166 | -0.069 |
| b Values for CPA-CR1 2B-2B taken from ([Román-Ramírez and Leeke 2020](#_ENREF_20)) | | | | | | | | | | | | | | | |

Table S5. Deviations ( and ) for correlations with from TableS4.a

| CPA-CR1 |  |  |  |  |  |  |  |  |  |  |  |  |
| --- | --- | --- | --- | --- | --- | --- | --- | --- | --- | --- | --- | --- |
| formic acid | 1A-2B | | 1A-3B | | 1A-4C | | 2B-2B | | 2B-3B | | 2B-4C | |
| *T* / K | *P* / % | *y1* | *P* / % | *y1* | *P* / % | *y1* | *P* / % | *y1* | *P* / % | *y1* | *P* / % | *y1* |
| 303.1 | 4.41 | 0.11 | 6.09 | 0.12 | 4.58 | 0.11 | 9.92 | 0.12 | 11.48 | 0.14 | 10.82 | 0.12 |
| 318.1 | 4.27 | 0.11 | 5.17 | 0.12 | 6.22 | 0.11 | 8.57 | 0.12 | 8.99 | 0.14 | 9.04 | 0.13 |
| 323.1 | 5.08 | 0.14 | 5.23 | 0.14 | 4.18 | 0.13 | 8.23 | 0.14 | 7.72 | 0.15 | 8.23 | 0.14 |
| 328.1 | 4.04 | 0.13 | 4.58 | 0.13 | 3.17 | 0.13 | 7.22 | 0.13 | 5.24 | 0.15 | 7.46 | 0.13 |
| 333.1 | 2.99 | 0.10 | 3.83 | 0.11 | 2.12 | 0.10 | 6.03 | 0.11 | 6.18 | 0.13 | 6.34 | 0.11 |
| 353.1 | 1.81 | 0.09 | 2.33 | 0.09 | 2.67 | 0.08 | 3.60 | 0.11 | 4.44 | 0.12 | 3.85 | 0.11 |
| 388.2 | 0.93 | 0.01 | 1.20 | 0.01 | 1.26 | 0.02 | 2.86 | 0.02 | 1.76 | 0.01 | 3.30 | 0.03 |
| 398.2 | 0.80 | 0.02 | 1.15 | 0.01 | 1.19 | 0.02 | 2.62 | 0.02 | 1.63 | 0.01 | 3.00 | 0.02 |
| Average | 3.04 | 0.09 | 3.70 | 0.09 | 3.17 | 0.09 | 6.13 | 0.10 | 5.93 | 0.11 | 6.51 | 0.10 |
| acetic acid | 1A-2B | | 1A-3B | | 1A-4C | | 2B-2B | | 2B-3B | | 2B-4C | |
| *T* / K | *P* / % | *y1* | *P* / % | *y1* | *P* / % | *y1* | *P* / % | *y1* | *P* / % | *y1* | *P* / % | *y1* |
| 293.2 | 7.78 | 0.05 | 9.88 | 0.06 | 5.62 | 0.04 | 4.98 | 0.03 | 7.71 | 0.05 | 3.35 | 0.02 |
| 303.2 | 2.39 | 0.03 | 4.21 | 0.04 | 2.72 | 0.02 | 0.96 | 0.01 | 2.06 | 0.02 | 2.14 | 0.01 |
| 313.2 | 8.02 | 0.05 | 9.31 | 0.06 | 6.46 | 0.05 | 5.15 | 0.03 | 6.48 | 0.06 | 3.97 | 0.03 |
| 343.2 | 5.21 | 0.03 | 6.57 | 0.04 | 3.95 | 0.03 | 3.03 | 0.02 | 5.98 | 0.03 | 2.13 | 0.01 |
| 363.0 | 5.58 | 0.04 | 6.76 | 0.04 | 4.19 | 0.03 | 3.18 | 0.02 | 5.12 | 0.03 | 2.01 | 0.02 |
| 373.1 | 3.70 | 0.04 | 4.56 | 0.05 | 2.53 | 0.04 | 1.35 | 0.03 | 2.47 | 0.04 | 0.54 | 0.03 |
| 412.6 | 4.69 |  | 5.52 |  | 3.78 |  | 2.80 |  | 3.97 |  | 2.06 |  |
| 443.2 | 5.48 |  | 6.28 |  | 4.86 |  | 3.54 |  | 4.73 |  | 2.80 |  |
| 483.2 | 3.98 |  | 4.69 |  | 3.37 |  | 2.45 |  | 3.68 |  | 1.95 |  |
| Average | 5.20 | 0.04 | 6.42 | 0.05 | 4.16 | 0.03 | 3.05 | 0.02 | 4.69 | 0.04 | 2.33 | 0.02 |
| propanoic acid | 1A-2B | | 1A-3B | | 1A-4C | | 2B-2B | | 2B-3B | | 2B-4C | |
| *T* / K | *P* / % | *y1* | *P* / % | *y1* | *P* / % | *y1* | *P* / % | *y1* | *P* / % | *y1* | *P* / % | *y1* |
| 303.2 | 11.50 | 0.07 | 9.84 | 0.07 | 5.36 | 0.06 | 7.28 | 0.05 | 19.54 | 0.06 | 4.06 | 0.04 |
| 313.1 | 11.38 | 0.05 | 14.11 | 0.05 | 8.44 | 0.03 | 10.62 | 0.03 | 15.67 | 0.04 | 8.04 | 0.03 |
| 343.2 | 15.62 | 0.08 | 17.34 | 0.09 | 13.66 | 0.07 | 13.64 | 0.06 | 10.02 | 0.06 | 11.25 | 0.05 |
| 373.1 | 9.62 | 0.03 | 13.07 | 0.05 | 7.54 | 0.03 | 9.53 | 0.03 | 8.65 | 0.05 | 6.93 | 0.03 |
| 423.2 | 12.27 | 0.09 | 13.29 | 0.09 | 10.29 | 0.09 | 10.95 | 0.07 | 10.55 | 0.06 | 9.50 | 0.07 |
| 453.2 | 13.34 | 0.12 | 13.98 | 0.12 | 11.36 | 0.13 | 10.95 | 0.10 | 12.21 | 0.10 | 9.77 | 0.10 |
| 483.2 | 11.51 | 0.17 | 12.51 | 0.17 | 10.30 | 0.17 | 8.97 | 0.15 | 10.22 | 0.15 | 8.26 | 0.15 |
| Average | 12.18 | 0.09 | 13.45 | 0.09 | 9.56 | 0.08 | 10.28 | 0.07 | 12.41 | 0.07 | 8.26 | 0.07 |
| butanoic acid | 1A-2B | | 1A-3B | | 1A-4C | | 2B-2B | | 2B-3B | | 2B-4C | |
| *T* / K | *P* / % | *y1* | *P* / % | *y1* | *P* / % | *y1* | *P* / % | *y1* | *P* / % | *y1* | *P* / % | *y1* |
| 303.2 | 12.80 | 0.04 | 16.68 | 0.04 | 10.14 | 0.04 | 11.24 | 0.05 | 12.57 | 0.05 | 7.13 | 0.05 |
| Average | 12.80 | 0.04 | 16.68 | 0.04 | 10.14 | 0.04 | 11.24 | 0.05 | 12.57 | 0.05 | 7.13 | 0.05 |
| Overall average | 6.77 | 0.07 | 7.93 | 0.08 | 5.60 | 0.07 | 6.39 | 0.07 | 7.56 | 0.08 | 5.52 | 0.07 |

Table S5. Continuation.

| CPA-ECR |  |  |  |  |  |  |  |  |  |  |  |  |
| --- | --- | --- | --- | --- | --- | --- | --- | --- | --- | --- | --- | --- |
| formic acid | 1A-2B | | 1A-3B | | 1A-4C | | 2B-2B | | 2B-3B | | 2B-4C | |
| *T* / K | *P* / % | *y1* | *P* / % | *y1* | *P* / % | *y1* | *P* / % | *y1* | *P* / % | *y1* | *P* / % | *y1* |
| 303.1 | 4.56 | 0.11 | 5.93 | 0.12 | 4.31 | 0.12 | 10.15 | 0.12 | 11.17 | 0.14 | 11.52 | 0.13 |
| 318.1 | 4.27 | 0.11 | 5.08 | 0.12 | 4.90 | 0.11 | 8.78 | 0.13 | 8.82 | 0.14 | 9.60 | 0.13 |
| 323.1 | 5.25 | 0.14 | 5.67 | 0.14 | 4.67 | 0.13 | 8.41 | 0.14 | 7.34 | 0.15 | 8.75 | 0.14 |
| 328.1 | 3.93 | 0.13 | 4.67 | 0.13 | 3.88 | 0.13 | 7.37 | 0.13 | 5.08 | 0.15 | 7.92 | 0.13 |
| 333.1 | 2.89 | 0.11 | 3.60 | 0.11 | 2.66 | 0.11 | 6.24 | 0.11 | 5.88 | 0.13 | 6.92 | 0.12 |
| 353.1 | 1.42 | 0.09 | 1.42 | 0.09 | 1.36 | 0.08 | 3.73 | 0.11 | 4.40 | 0.12 | 4.30 | 0.12 |
| 388.2 | 0.72 | 0.01 | 0.64 | 0.01 | 1.13 | 0.02 | 3.07 | 0.02 | 1.71 | 0.01 | 3.91 | 0.03 |
| 398.2 | 0.59 | 0.01 | 0.57 | 0.01 | 1.04 | 0.02 | 2.81 | 0.02 | 1.86 | 0.01 | 3.55 | 0.03 |
| Average | 2.96 | 0.09 | 3.45 | 0.09 | 2.99 | 0.09 | 6.32 | 0.10 | 5.78 | 0.11 | 7.06 | 0.10 |
| acetic acid | 1A-2B | | 1A-3B | | 1A-4C | | 2B-2B | | 2B-3B | | 2B-4C | |
| *T* / K | *P* / % | *y1* | *P* / % | *y1* | *P* / % | *y1* | *P* / % | *y1* | *P* / % | *y1* | *P* / % | *y1* |
| 293.2 | 5.95 | 0.04 | 7.12 | 0.05 | 3.15 | 0.02 | 3.63 | 0.02 | 6.03 | 0.04 | 1.78 | 0.02 |
| 303.2 | 1.51 | 0.02 | 9.65 | 0.03 | 2.65 | 0.02 | 2.01 | 0.01 | 0.73 | 0.01 | 4.54 | 0.02 |
| 313.2 | 6.20 | 0.04 | 6.89 | 0.05 | 3.82 | 0.03 | 4.05 | 0.03 | 6.76 | 0.04 | 1.89 | 0.03 |
| 343.2 | 3.84 | 0.03 | 4.86 | 0.03 | 2.55 | 0.02 | 2.10 | 0.01 | 4.86 | 0.02 | 1.04 | 0.01 |
| 363.0 | 4.12 | 0.03 | 4.87 | 0.03 | 2.51 | 0.02 | 2.15 | 0.02 | 3.49 | 0.03 | 0.89 | 0.02 |
| 373.1 | 2.22 | 0.03 | 2.60 | 0.03 | 0.90 | 0.04 | 0.70 | 0.02 | 1.27 | 0.03 | 2.00 | 0.03 |
| 412.6 | 3.65 |  | 4.23 |  | 2.37 |  | 2.08 |  | 2.91 |  | 0.80 |  |
| 443.2 | 4.42 |  | 4.96 |  | 3.31 |  | 2.69 |  | 3.56 |  | 1.37 |  |
| 483.2 | 3.05 |  | 3.55 |  | 2.10 |  | 1.70 |  | 2.39 |  | 0.80 |  |
| Average | 3.88 | 0.03 | 5.41 | 0.04 | 2.59 | 0.02 | 2.34 | 0.02 | 3.56 | 0.03 | 1.68 | 0.02 |
| propanoic acid | 1A-2B | | 1A-3B | | 1A-4C | | 2B-2B | | 2B-3B | | 2B-4C | |
| *T* / K | *P* / % | *y1* | *P* / % | *y1* | *P* / % | *y1* | *P* / % | *y1* | *P* / % | *y1* | *P* / % | *y1* |
| 303.2 | 6.01 | 0.05 | 8.80 | 0.06 | 3.98 | 0.03 | 3.75 | 0.04 | 13.17 | 0.04 | 2.93 | 0.02 |
| 313.1 | 9.26 | 0.03 | 11.54 | 0.04 | 4.57 | 0.01 | 7.91 | 0.03 | 7.13 | 0.03 | 3.39 | 0.02 |
| 343.2 | 12.33 | 0.07 | 14.08 | 0.07 | 9.32 | 0.05 | 10.57 | 0.05 | 8.77 | 0.04 | 6.23 | 0.03 |
| 373.1 | 6.30 | 0.04 | 9.13 | 0.03 | 3.92 | 0.02 | 6.08 | 0.04 | 5.75 | 0.04 | 1.67 | 0.03 |
| 423.2 | 10.50 | 0.08 | 10.97 | 0.08 | 7.37 | 0.09 | 8.95 | 0.06 | 9.75 | 0.06 | 5.78 | 0.06 |
| 453.2 | 10.73 | 0.12 | 11.22 | 0.11 | 7.74 | 0.12 | 8.67 | 0.09 | 9.46 | 0.09 | 5.55 | 0.10 |
| 483.2 | 8.97 | 0.16 | 9.47 | 0.16 | 6.67 | 0.17 | 6.86 | 0.14 | 7.57 | 0.14 | 4.35 | 0.14 |
| Average | 9.16 | 0.08 | 10.74 | 0.08 | 6.23 | 0.07 | 7.54 | 0.06 | 8.80 | 0.06 | 4.27 | 0.06 |
| butanoic acid | 1A-2B | | 1A-3B | | 1A-4C | | 2B-2B | | 2B-3B | | 2B-4C | |
| *T* / K | *P* / % | *y1* | *P* / % | *y1* | *P* / % | *y1* | *P* / % | *y1* | *P* / % | *y1* | *P* / % | *y1* |
| 303.2 | 7.54 | 0.05 | 10.56 | 0.05 | 7.97 | 0.05 | 5.82 | 0.05 | 14.49 | 0.05 | 4.21 | 0.06 |
| Average | 7.54 | 0.05 | 10.56 | 0.05 | 7.97 | 0.05 | 5.82 | 0.05 | 14.49 | 0.05 | 4.21 | 0.06 |
| Overall average | 5.21 | 0.07 | 6.48 | 0.07 | 3.95 | 0.06 | 5.21 | 0.06 | 6.17 | 0.07 | 4.23 | 0.06 |

Table S5. Continuation.

| PC-SAFT |  |  |  |  |  |  |  |  |  |  |  |  |  |  |
| --- | --- | --- | --- | --- | --- | --- | --- | --- | --- | --- | --- | --- | --- | --- |
| formic acid | 1A-2B | | 1A-3B | | 1A-4C | | 2B-2B | | 2B-3B | | 2B-4C | | Non-assoc. | |
| *T* / K | *P* / % | *y1* | *P* / % | *y1* | *P* / % | *y1* | *P* / % | *y1* | *P* / % | *y1* | *P* / % | *y1* | *P* / % | *y1* |
| 303.1 | 5.70 | 0.12 | 7.83 | 0.14 | 8.23 | 0.12 | 10.15 | 0.12 | 9.06 | 0.12 | 11.44 | 0.13 | 9.53 | 0.12 |
| 318.1 | 5.61 | 0.11 | 7.29 | 0.13 | 6.94 | 0.12 | 8.30 | 0.13 | 7.37 | 0.12 | 9.28 | 0.13 | 8.66 | 0.13 |
| 323.1 | 5.53 | 0.13 | 6.78 | 0.14 | 6.20 | 0.14 | 7.54 | 0.14 | 6.57 | 0.14 | 8.53 | 0.14 | 8.02 | 0.14 |
| 328.1 | 4.67 | 0.13 | 6.50 | 0.14 | 6.06 | 0.13 | 7.01 | 0.13 | 6.16 | 0.13 | 7.78 | 0.13 | 7.87 | 0.13 |
| 333.1 | 3.38 | 0.11 | 4.98 | 0.12 | 5.09 | 0.11 | 5.64 | 0.11 | 4.77 | 0.11 | 6.71 | 0.12 | 6.66 | 0.12 |
| 353.1 | 1.32 | 0.10 | 2.65 | 0.11 | 1.74 | 0.10 | 3.73 | 0.11 | 3.04 | 0.10 | 4.37 | 0.12 | 5.17 | 0.12 |
| 388.2 | 1.30 | 0.01 | 2.66 | 0.02 | 2.49 | 0.02 | 2.98 | 0.02 | 2.15 | 0.02 | 3.92 | 0.03 | 3.62 | 0.03 |
| 398.2 | 1.38 | 0.01 | 2.58 | 0.02 | 2.38 | 0.02 | 2.75 | 0.02 | 2.01 | 0.02 | 3.62 | 0.03 | 3.38 | 0.03 |
| Average | 3.61 | 0.09 | 5.16 | 0.10 | 4.89 | 0.09 | 6.01 | 0.10 | 5.14 | 0.10 | 6.96 | 0.10 | 6.62 | 0.10 |
| acetic acid | 1A-2B | | 1A-3B | | 1A-4C | | 2B-2B | | 2B-3B | | 2B-4C | | Non-assoc. | |
| *T* / K | *P* / % | *y1* | *P* / % | *y1* | *P* / % | *y1* | *P* / % | *y1* | *P* / % | *y1* | *P* / % | *y1* | *P* / % | *y1* |
| 293.2 | 2.87 | 0.02 | 1.20 | 0.01 | 2.81 | 0.03 | 2.58 | 0.02 | 2.37 | 0.03 | 1.64 | 0.02 | 5.90 | 0.04 |
| 303.2 | 2.04 | 0.02 | 3.60 | 0.03 | 6.10 | 0.04 | 2.78 | 0.01 | 2.58 | 0.01 | 5.44 | 0.03 | 1.33 | 0.01 |
| 313.2 | 3.29 | 0.02 | 1.18 | 0.01 | 2.18 | 0.02 | 3.23 | 0.03 | 3.44 | 0.03 | 1.48 | 0.03 | 5.17 | 0.04 |
| 343.2 | 1.80 | 0.01 | 0.72 | 0.00 | 2.06 | 0.02 | 1.70 | 0.01 | 1.93 | 0.01 | 1.33 | 0.02 | 2.62 | 0.01 |
| 363.0 | 1.78 | 0.01 | 0.40 | 0.00 | 2.27 | 0.02 | 1.48 | 0.02 | 1.82 | 0.02 | 1.34 | 0.02 | 2.35 | 0.02 |
| 373.1 | 0.54 | 0.02 | 1.67 | 0.02 | 2.46 | 0.03 | 0.69 | 0.02 | 0.44 | 0.03 | 2.46 | 0.03 | 1.23 | 0.02 |
| 412.6 | 2.05 |  | 1.11 |  | 1.83 |  | 1.61 |  | 2.32 |  | 1.02 |  | 2.61 |  |
| 443.2 | 2.75 |  | 1.84 |  | 2.12 |  | 2.11 |  | 2.84 |  | 1.25 |  | 2.90 |  |
| 483.2 | 1.75 |  | 1.02 |  | 1.38 |  | 1.24 |  | 1.56 |  | 0.80 |  | 2.06 |  |
| Average | 2.10 | 0.02 | 1.41 | 0.01 | 2.58 | 0.03 | 1.93 | 0.02 | 2.14 | 0.02 | 1.86 | 0.03 | 2.91 | 0.02 |
| propanoic acid | 1A-2B | | 1A-3B | | 1A-4C | | 2B-2B | | 2B-3B | | 2B-4C | | Non-assoc. | |
| *T* / K | *P* / % | *y1* | *P* / % | *y1* | *P* / % | *y1* | *P* / % | *y1* | *P* / % | *y1* | *P* / % | *y1* | *P* / % | *y1* |
| 303.2 | 4.62 | 0.05 | 5.60 | 0.04 | 4.30 | 0.03 | 2.90 | 0.04 | 5.79 | 0.04 | 4.08 | 0.02 | 3.77 | 0.04 |
| 313.1 | 8.49 | 0.03 | 9.47 | 0.03 | 3.74 | 0.01 | 10.19 | 0.05 | 7.25 | 0.03 | 2.73 | 0.02 | 8.47 | 0.03 |
| 343.2 | 11.34 | 0.06 | 11.27 | 0.06 | 8.65 | 0.04 | 9.45 | 0.04 | 9.08 | 0.04 | 5.99 | 0.03 | 10.25 | 0.05 |
| 373.1 | 6.91 | 0.03 | 6.68 | 0.03 | 3.75 | 0.03 | 4.65 | 0.04 | 5.35 | 0.04 | 2.02 | 0.03 | 6.35 | 0.04 |
| 423.2 | 9.42 | 0.08 | 9.08 | 0.07 | 6.75 | 0.08 | 8.09 | 0.06 | 8.67 | 0.06 | 5.34 | 0.06 | 9.77 | 0.05 |
| 453.2 | 9.68 | 0.11 | 9.26 | 0.11 | 7.08 | 0.11 | 7.87 | 0.09 | 8.50 | 0.09 | 5.18 | 0.09 | 9.26 | 0.08 |
| 483.2 | 8.18 | 0.16 | 7.82 | 0.15 | 6.22 | 0.16 | 6.27 | 0.14 | 6.71 | 0.14 | 4.10 | 0.14 | 7.65 | 0.12 |
| Average | 8.38 | 0.07 | 8.45 | 0.07 | 5.78 | 0.07 | 7.06 | 0.06 | 7.34 | 0.06 | 4.21 | 0.05 | 7.93 | 0.06 |
| butanoic acid | 1A-2B | | 1A-3B | | 1A-4C | | 2B-2B | | 2B-3B | | 2B-4C | | Non-assoc. | |
| *T* / K | *P* / % | *y1* | *P* / % | *y1* | *P* / % | *y1* | *P* / % | *y1* | *P* / % | *y1* | *P* / % | *y1* | *P* / % | *y1* |
| 303.2 | 6.59 | 0.05 | 8.72 | 0.05 | 7.65 | 0.05 | 4.55 | 0.05 | 5.71 | 0.05 | 4.58 | 0.06 | 6.58 | 0.05 |
| Average | 6.59 | 0.05 | 8.72 | 0.05 | 7.65 | 0.05 | 4.55 | 0.05 | 5.71 | 0.05 | 4.58 | 0.06 | 6.58 | 0.05 |
| Overall average | 4.52 | 0.06 | 4.88 | 0.07 | 4.42 | 0.06 | 4.78 | 0.06 | 4.70 | 0.06 | 4.26 | 0.06 | 5.65 | 0.06 |

Table S5. Continuation.

| PCP-SAFT |  |  |  |  |  |  |  |  |  |  |  |  |  |  |
| --- | --- | --- | --- | --- | --- | --- | --- | --- | --- | --- | --- | --- | --- | --- |
| formic acid | 1A-2B | | 1A-3B | | 1A-4C | | 2B-2B | | 2B-3B | | 2B-4C | | Non-assoc. | |
| *T* / K | *P* / % | *y1* | *P* / % | *y1* | *P* / % | *y1* | *P* / % | *y1* | *P* / % | *y1* | *P* / % | *y1* | *P* / % | *y1* |
| 303.1 | 8.66 | 0.12 | 9.31 | 0.14 | 8.78 | 0.14 | 12.24 | 0.13 | 12.46 | 0.13 | 13.04 | 0.13 | 11.81 | 0.13 |
| 318.1 | 7.30 | 0.12 | 7.97 | 0.14 | 8.08 | 0.13 | 9.87 | 0.13 | 9.90 | 0.13 | 10.46 | 0.14 | 10.45 | 0.14 |
| 323.1 | 6.64 | 0.14 | 7.65 | 0.14 | 7.13 | 0.14 | 9.03 | 0.14 | 11.90 | 0.13 | 9.59 | 0.14 | 9.71 | 0.14 |
| 328.1 | 6.42 | 0.13 | 7.04 | 0.15 | 7.01 | 0.13 | 8.18 | 0.13 | 11.65 | 0.12 | 8.70 | 0.13 | 8.86 | 0.13 |
| 333.1 | 5.31 | 0.11 | 6.02 | 0.13 | 6.12 | 0.11 | 7.19 | 0.12 | 6.59 | 0.12 | 7.80 | 0.12 | 8.27 | 0.12 |
| 353.1 | 2.07 | 0.11 | 2.80 | 0.12 | 2.05 | 0.11 | 4.63 | 0.12 | 4.56 | 0.12 | 4.95 | 0.12 | 5.74 | 0.13 |
| 388.2 | 2.70 | 0.02 | 3.39 | 0.02 | 3.00 | 0.02 | 4.17 | 0.03 | 3.40 | 0.03 | 4.67 | 0.03 | 5.27 | 0.04 |
| 398.2 | 2.62 | 0.02 | 3.23 | 0.02 | 2.84 | 0.02 | 3.90 | 0.03 | 3.20 | 0.02 | 4.35 | 0.03 | 4.93 | 0.03 |
| Average | 5.21 | 0.10 | 5.93 | 0.11 | 5.63 | 0.10 | 7.40 | 0.10 | 7.96 | 0.10 | 7.94 | 0.10 | 8.13 | 0.11 |
| acetic acid | 1A-2B | | 1A-3B | | 1A-4C | | 2B-2B | | 2B-3B | | 2B-4C | | Non-assoc. | |
| *T* / K | *P* / % | *y1* | *P* / % | *y1* | *P* / % | *y1* | *P* / % | *y1* | *P* / % | *y1* | *P* / % | *y1* | *P* / % | *y1* |
| 293.2 | 2.15 | 0.02 | 2.74 | 0.02 | 4.16 | 0.04 | 1.92 | 0.03 | 3.14 | 0.03 | 3.34 | 0.04 | 3.04 | 0.05 |
| 303.2 | 5.51 | 0.03 | 10.61 | 0.04 | 7.71 | 0.05 | 5.84 | 0.03 | 5.73 | 0.03 | 7.47 | 0.05 | 3.43 | 0.02 |
| 313.2 | 1.61 | 0.01 | 1.47 | 0.02 | 2.76 | 0.03 | 1.64 | 0.03 | 2.10 | 0.04 | 2.07 | 0.04 | 2.79 | 0.04 |
| 343.2 | 1.38 | 0.01 | 1.29 | 0.01 | 2.53 | 0.02 | 1.45 | 0.02 | 1.08 | 0.02 | 2.04 | 0.02 | 0.71 | 0.01 |
| 363.0 | 1.28 | 0.01 | 1.41 | 0.01 | 2.78 | 0.02 | 1.40 | 0.02 | 1.22 | 0.03 | 2.31 | 0.03 | 0.66 | 0.02 |
| 373.1 | 1.97 | 0.02 | 2.46 | 0.02 | 2.85 | 0.03 | 2.51 | 0.03 | 1.36 | 0.03 | 3.32 | 0.03 | 2.37 | 0.02 |
| 412.6 | 1.11 |  | 0.95 |  | 1.98 |  | 1.00 |  | 1.26 |  | 1.58 |  | 0.81 |  |
| 443.2 | 1.71 |  | 1.56 |  | 2.13 |  | 1.23 |  | 1.85 |  | 1.71 |  | 1.19 |  |
| 483.2 | 0.88 |  | 0.87 |  | 1.44 |  | 0.78 |  | 1.02 |  | 1.02 |  | 0.77 |  |
| Average | 1.96 | 0.02 | 2.60 | 0.02 | 3.15 | 0.03 | 1.97 | 0.03 | 2.09 | 0.03 | 2.76 | 0.04 | 1.75 | 0.03 |
| propanoic acid | 1A-2B | | 1A-3B | | 1A-4C | | 2B-2B | | 2B-3B | | 2B-4C | | Non-assoc. | |
| *T* / K | *P* / % | *y1* | *P* / % | *y1* | *P* / % | *y1* | *P* / % | *y1* | *P* / % | *y1* | *P* / % | *y1* | *P* / % | *y1* |
| 303.2 | 3.64 | 0.03 | 3.19 | 0.03 | 7.87 | 0.03 | 5.56 | 0.02 | 5.41 | 0.02 | 10.01 | 0.02 | 3.05 | 0.03 |
| 313.1 | 4.15 | 0.01 | 4.50 | 0.02 | 4.40 | 0.02 | 2.29 | 0.02 | 3.16 | 0.02 | 3.02 | 0.03 | 3.70 | 0.01 |
| 343.2 | 7.81 | 0.04 | 8.44 | 0.04 | 9.22 | 0.03 | 6.50 | 0.02 | 6.38 | 0.03 | 7.22 | 0.03 | 5.64 | 0.03 |
| 373.1 | 3.14 | 0.03 | 3.79 | 0.03 | 4.55 | 0.03 | 2.25 | 0.03 | 3.14 | 0.03 | 3.68 | 0.04 | 1.75 | 0.03 |
| 423.2 | 6.89 | 0.07 | 7.46 | 0.07 | 6.58 | 0.07 | 5.19 | 0.05 | 6.13 | 0.05 | 4.59 | 0.05 | 6.17 | 0.05 |
| 453.2 | 7.13 | 0.10 | 7.91 | 0.10 | 6.59 | 0.11 | 5.00 | 0.09 | 6.18 | 0.09 | 4.08 | 0.09 | 6.12 | 0.08 |
| 483.2 | 6.03 | 0.15 | 6.88 | 0.15 | 5.96 | 0.15 | 3.88 | 0.13 | 4.97 | 0.13 | 3.19 | 0.13 | 5.07 | 0.12 |
| Average | 5.54 | 0.06 | 6.02 | 0.06 | 6.45 | 0.06 | 4.38 | 0.05 | 5.05 | 0.05 | 5.11 | 0.06 | 4.50 | 0.05 |
| butanoic acid | 1A-2B | | 1A-3B | | 1A-4C | | 2B-2B | | 2B-3B | | 2B-4C | | Non-assoc. | |
| *T* / K | *P* / % | *y1* | *P* / % | *y1* | *P* / % | *y1* | *P* / % | *y1* | *P* / % | *y1* | *P* / % | *y1* | *P* / % | *y1* |
| 303.2 | 7.18 | 0.05 | 7.02 | 0.05 | 11.55 | 0.06 | 6.99 | 0.06 | 8.06 | 0.05 | 13.14 | 0.05 | 4.80 | 0.06 |
| Average | 7.18 | 0.05 | 7.02 | 0.05 | 11.55 | 0.06 | 6.99 | 0.06 | 8.06 | 0.05 | 13.14 | 0.05 | 4.80 | 0.06 |
| Overall average | 4.21 | 0.06 | 4.80 | 0.07 | 5.20 | 0.07 | 4.59 | 0.06 | 5.04 | 0.06 | 5.49 | 0.07 | 4.68 | 0.06 |
| b Values for CPA-CR1 2B-2B taken from ([Román-Ramírez and Leeke 2020](#_ENREF_20)) | | | | | | | | | | | | | | |

# References

Achary M. V. R. and Narasingrao M. 1947. Vapour–liquid equilibria of non-ideal solutions - I. *Trans Indian Inst Chem Eng*. **1**, 29-37.

Arich G. and Tagliavini G. 1958. Liquid–vapor equilibrium isotherms for the water–acetic acid system. *Ric Sci*. **28**, 2493-2500.

Brazauskiene J., Mishchenko K. P. and Ciparis J. 1965. The liquid–vapor equilibrium in the propionic acid–water system under isothermal conditions (40, 50, 60 °C). *Liet TSR Aukst Mokyklu Mokslo Darb, Chem Chem Technol*. **6**, 141.

Campbell A. N. and Campbell A. J. R. 1934. The thermodynamics of binary liquid mixtures: Formic acid and water. *Trans Faraday Soc*. **30**(0), 1109-1114. DOI: 10.1039/TF9343001109.

Folas G. K. 2006. Modeling of complex mixtures containing hydrogen bonding molecules [PhD Thesis]. Lyngby, Denmark: Technical University of Denmark.

Gross J. and Sadowski G. 2001. Perturbed-chain SAFT: An equation of state based on a perturbation theory for chain molecules. *Ind Eng Chem Res*. **40**(4), 1244-1260.

Gross J. and Sadowski G. 2002. Application of the perturbed-chain SAFT equation of state to associating systems. *Ind Eng Chem Res*. **41**(22), 5510-5515. DOI: 10.1021/ie010954d.

Gross J. and Vrabec J. 2006. An equation-of-state contribution for polar components: Dipolar molecules. *AlChE J*. **52**(3), 1194-1204. DOI: 10.1002/aic.10683.

Kontogeorgis G. M. and Folas G. K. 2010. Thermodynamic models for industrial applications. West Sussex, United Kingdom: John Wiley and Sons.

Kontogeorgis G. M., Michelsen M. L., Folas G. K., Derawi S., von Solms N. and Stenby E. H. 2006a. Ten years with the CPA (cubic-plus-association) equation of state. Part 1. Pure compounds and self-associating systems. *Ind Eng Chem Res*. **45**(14), 4855-4868. DOI: 10.1021/ie051305v.

Kontogeorgis G. M., Michelsen M. L., Folas G. K., Derawi S., von Solms N. and Stenby E. H. 2006b. Ten years with the CPA (cubic-plus-association) equation of state. Part 2. Cross-associating and multicomponent systems. *Ind Eng Chem Res*. **45**(14), 4869-4878. DOI: 10.1021/ie051306n.

Kontogeorgis G. M., V. Yakoumis I., Meijer H., Hendriks E. and Moorwood T. 1999. Multicomponent phase equilibrium calculations for water–methanol–alkane mixtures. *Fluid Phase Equilib*. **158–160**, 201-209. DOI: 10.1016/S0378-3812(99)00060-6.

Lazeeva M. S. and Markuzin N. P. 1973. Experimental data on equilibrium between phases and chemical equilibrium in vapor in acetic acid–water system at 20, 40 and 80°C. *Zh Prikl Khim*. **46**(2), 360-363.

Michelsen M. L. and Mollerup J. 2007. Thermodynamic models: Fundamentals and computational aspects. 2nd ed. Denmark: Tie-Line Publications.

Miyamoto S., Nakamura S., Iwai Y. and Arai Y. 2001. Measurement of isothermal vapor–liquid equilibria for binary and ternary systems containing monocarboxylic acid. *J Chem Eng Data*. **46**(5), 1225-1230.

Rafflenbeul L. and Hartmann H. 1978. Eine dynamische apparatur zur bestimmung von dampf-flüssigkeits-phasengleichgewichten. *Chemie-Technik*. **7**(4), 145-148.

Rivenq F. 1962. Ebulliometry of mixtures of water and butyric acid. *Bull Soc Chim Fr*. 1192-1195.

Román-Ramírez L. A., García-Sánchez F., Santos R. C. D. and Leeke G. A. 2015. Vapour–liquid equilibrium of propanoic acid + water at 423.2, 453.2 and 483.2 K from 1.87 to 19.38 bar. Experimental and modelling with PR, CPA, PC-SAFT and PCP-SAFT. *Fluid Phase Equilib*. **388**, 151-159. DOI: 10.1016/j.fluid.2015.01.004.

Román-Ramírez L. A. and Leeke G. A. 2016. p–x data of (acetic acid + water) at T = (412.6, 443.2, 483.2) K. *J Chem Eng Data*. **61**(6), 2078-2082. DOI: 10.1021/acs.jced.5b01104.

Román-Ramírez L. A. and Leeke G. A. 2020. Evaluation of the peng–robinson and the cubic-plus-association equations of state in modeling VLE of carboxylic acids with water. *Int J Thermophys*. **41**(5), 61. DOI: 10.1007/s10765-020-02643-6.

Sommer T., Trejbal J. and Kopecký D. 2016. Isobaric and isothermal vapor–liquid equilibria for the binary system of water + formic acid at 99.41 kPa, 388.15 K, and 398.15 K. *J Chem Eng Data*. **61**(10), 3398-3405. DOI: 10.1021/acs.jced.6b00139.

Tunik E. E. and Zharov V. T. 1980. Phase and chemical equilibria in the formic acid-water-isopropyl formate-isopropanol system. *Depos Doc VINITI*. 1242-1280.

Udovenko V. V. and Aleksandrova L. P. 1960. The vapor pressures of three-component systems: III. *Zh Fiz Khim*. **34**, 1366-1372.

Vrevskii M. S. and Glagoleva A. A. 1927. The dissociation of formic acid vapors and the equilibrium between its aqueous solutions and their vapors. *Zh Russ Fiz-Khim O-va, Chast Khim*. **59**, 608.

Wright E. H. M. and Akhtar B. A. 1970. Soluble surface films of short-chain monocarboxylic acids on organic and aqueous substrates. *J Chem Soc B*.(0), 151-157. DOI: 10.1039/J29700000151.
